# Supplementary material for: Influence of Vinyl Acetate Content and Melt Flow Index of Ethylene-Vinyl Acetate Copolymer on Physico-Mechanical and Physico-Chemical Properties of Highly Filled Biocomposites
Source: MDPI journal article supplement (doi:10.3390/polym15122639), 2023-06-10

**EVA 28150 +MCC 50 %**

Speed: 100.000 mm/min

Extrusion Grinev (Thickness: 1.0 mm) ; +21.8°C, 7.7%HR Test Data: 15-03-2018

Metod

| Test No. | Material          | Width<br>mm | Thick<br>ness<br>mm | Max.<br>Load<br>MPa | Yield<br>point<br>MPa | Max.<br>Load<br>% | Break<br>MPa | Elastic<br>modulus<br>MPa | Input<br>Grip<br>% | Grip<br>traversa<br>% | Comentary<br>° |
|----------|-------------------|-------------|---------------------|---------------------|-----------------------|-------------------|--------------|---------------------------|--------------------|-----------------------|----------------|
| 1        | 28150 + Cell. 50% | 4.1         | 0.16                | 2.3                 | 2.3                   | 11.9              | 0.5          | 5.8                       | 43.3               | 41.3                  | OK             |
| 2        | 28150 + Cell. 50% | 4.1         | 0.16                | 1.6                 | 1.6                   | 10.1              | 0.5          | 0.3                       | 20.0               | 18.4                  | NO             |
| 3        | 28150 + Cell. 50% | 4.1         | 0.16                | 1.8                 | 1.8                   | 10.2              | 0.5          | 22.5                      | 18.3               | 17.5                  | NO             |
| 4        | 28150 + Cell. 50% | 4.1         | 0.16                | 1.1                 | 1.1                   | 9.9               | 0.3          | 20.2                      | 26.7               | 25.9 (speed 25mm)     | NO             |
| 5        | 28150 + Cell. 50% | 4.1         | 0.15                | 2.4                 | 2.4                   | 13.4              | 0.7          | 16.6                      | 36.7               | 34.7                  | OK             |
| ---      | ---               | ---         | ---                 | ---                 | ---                   | ---               | ---          | ---                       | ---                | ---                   | ---            |
| Avera    | ---               | 4.1         | 0.16                | 1.8                 | 1.8                   | 11.1              | 0.5          | 13.1                      | 29.0               | 27.7                  | ---            |
| SD(N)    | ---               | 0.0         | 0.00                | 0.5                 | 0.5                   | 1.4               | 0.1          | 8.6                       | 9.6                | 9.2                   | ---            |
| CV%      | ---               | 0.0         | 2.53                | 25.9                | 25.9                  | 12.2              | 25.3         | 65.6                      | 33.2               | 33.2                  | ---            |

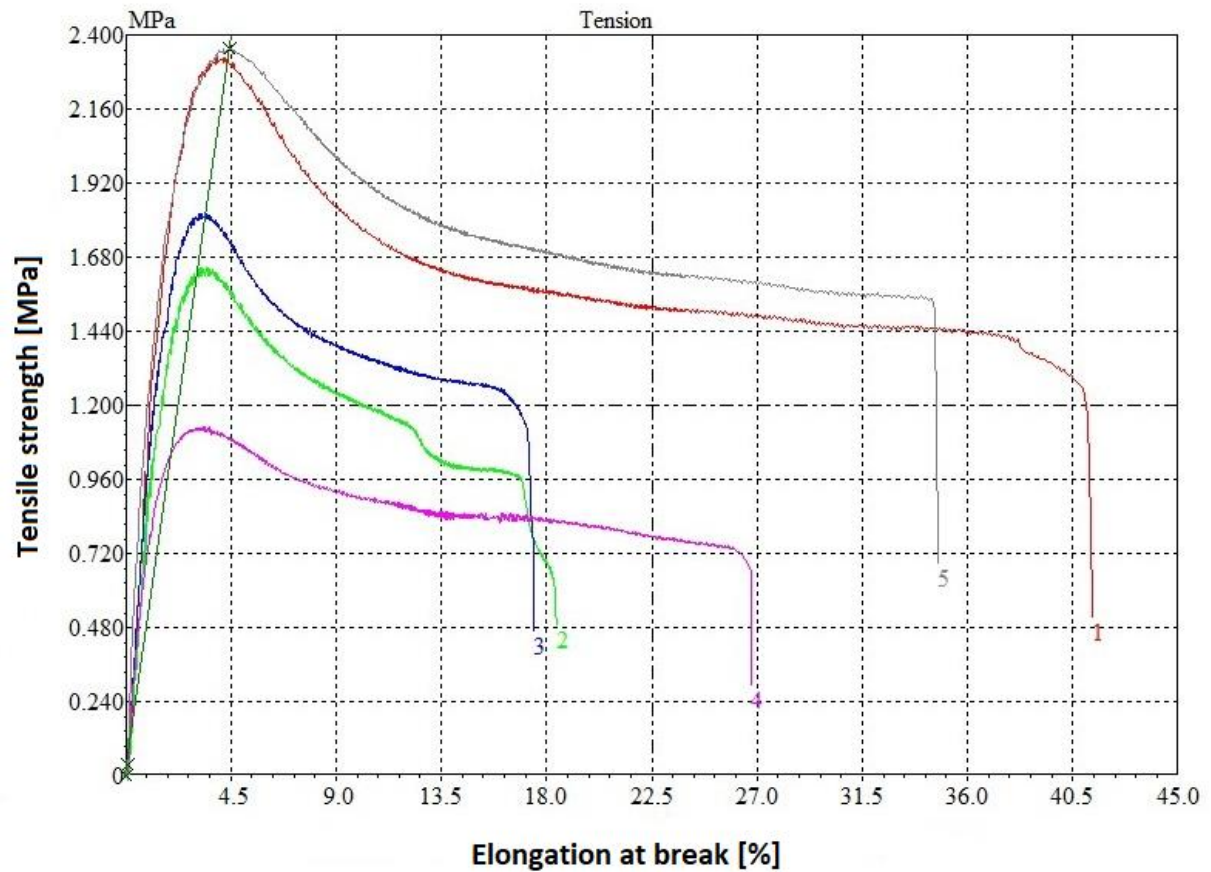

**EVA 28025 + MCC 50%**

Speed: 100.000 mm/min

Extrusion Grinev (Thickness: 1.0 mm) ; +21.8°C, 7.7%HR Test Data: 15-03-2018

Metod

| Test No. | Material          | Width<br>mm | Thick<br>ness<br>mm | Max.<br>Load<br>MPa | Yield<br>point<br>MPa | Max.<br>Load<br>% | Break<br>MPa | Elastic<br>modulus<br>MPa | Input<br>Grip<br>% | Grip<br>traversa<br>% | Comentary<br>° |
|----------|-------------------|-------------|---------------------|---------------------|-----------------------|-------------------|--------------|---------------------------|--------------------|-----------------------|----------------|
| 1        | 28025 + Cell. 50% | 4.1         | 0.20                | 3.0                 | 3.0                   | 4.3               | 0.5          | 115.5                     | 186.7              | 186.2                 | OK             |
| 2        | 28025 + Cell. 50% | 4.1         | 0.20                | 2.9                 | 2.9                   | 11.5              | 0.6          | -                         | 186.7              | 184.9                 | NO             |
| 3        | 28025 + Cell. 50% | 4.1         | 0.21                | 3.1                 | 3.1                   | 12.7              | 0.4          | 15.2                      | 170.0              | 167.7                 | No (d)         |
| 4        | 28025 + Cell. 50% | 4.1         | 0.21                | 3.3                 | 3.3                   | 12.0              | 0.6          | 22.9                      | 180.0              | 177.9                 | OK             |
| 5        | 28025 + Cell. 50% | 4.1         | 0.19                | 3.3                 | 3.3                   | 14.0              | 0.5          | 22.5                      | 185.0              | 183.7                 | OK             |
| ---      | ---               | ---         | ---                 | ---                 | ---                   | ---               | ---          | ---                       | ---                | ---                   | ---            |
| Avera    | ---               | 4.1         | 0.20                | 3.1                 | 3.1                   | 10.9              | 0.5          | 44.0                      | 181.7              | 180.1                 | ---            |
| SD(N)    | ---               | 0.0         | 0.01                | 0.2                 | 0.2                   | 3.4               | 0.1          | 41.4                      | 6.3                | 6.8                   | ---            |
| CV%      | ---               | 0.0         | 3.70                | 5.1                 | 5.1                   | 31.2              | 14.4         | 94.0                      | 3.5                | 3.8                   | ---            |

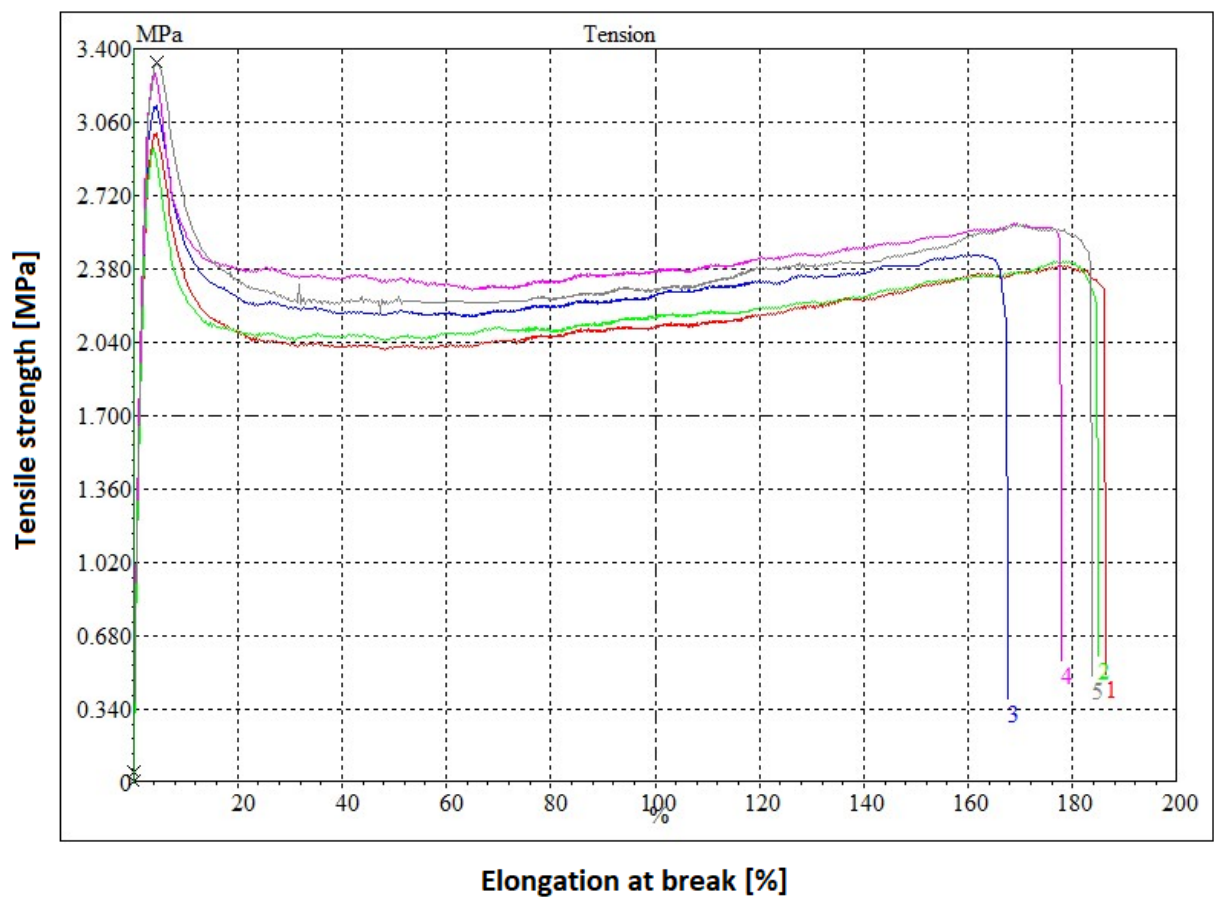

**EVA 28005 + MCC 50%**

Speed: 100.000 mm/min

Extrusion Grinev (Thickness: 1.0 mm) ; +21.8°C, 7.7%HR Test Data: 16-03-2018

Metod

| Test No. | Material          | Width<br>mm | Thick<br>ness<br>mm | Max.<br>Load<br>MPa | Yield<br>point<br>MPa | Max.<br>Load<br>% | Break<br>MPa | Elastic<br>modulus<br>MPa | Input<br>Grip<br>% | Grip<br>traversa<br>% | Comentary<br>o |
|----------|-------------------|-------------|---------------------|---------------------|-----------------------|-------------------|--------------|---------------------------|--------------------|-----------------------|----------------|
| 1        | 28005 + Cell. 50% | 4.1         | 0.24                | 4.4                 | 3.7                   | 4.9               | 0.8          | 55.4                      | 258.3              | 255.8                 | OK             |
| 2        | 28005 + Cell. 50% | 4.1         | 0.25                | 3.8                 | 3.4                   | 4.7               | 0.7          | 64.6                      | 233.3              | 230.3                 | OK             |
| 3        | 28005 + Cell. 50% | 4.1         | 0.22                | 4.2                 | 3.6                   | 4.6               | 0.8          | 79.5                      | 248.3              | 245.4                 | NO             |
| 4        | 28005 + Cell. 50% | 4.1         | 0.23                | 4.2                 | 3.9                   | 4.6               | 0.7          | 131.8                     | 225.0              | 222.2                 | NO             |
| 5        | 28005 + Cell. 50% | 4.1         | 0.22                | 4.1                 | 3.6                   | 4.6               | 0.7          | 81.3                      | 233.3              | 231.6                 | NO             |
| ---      | ---               | ---         | ---                 | ---                 | ---                   | ---               | ---          | ---                       | ---                | ---                   | ---            |
| Avera    | ---               | 4.1         | 0.23                | 4.1                 | 3.6                   | 4.7               | 0.7          | 82.5                      | 239.6              | 237.1                 | ---            |
| SD(N)    | ---               | 0.0         | 0.01                | 0.2                 | 0.2                   | 0.1               | 0.0          | 26.4                      | 12.0               | 12.0                  | ---            |
| CV%      | ---               | 0.0         | 5.03                | 4.7                 | 4.5                   | 2.5               | 6.6          | 32.0                      | 5.0                | 5.1                   | ---            |

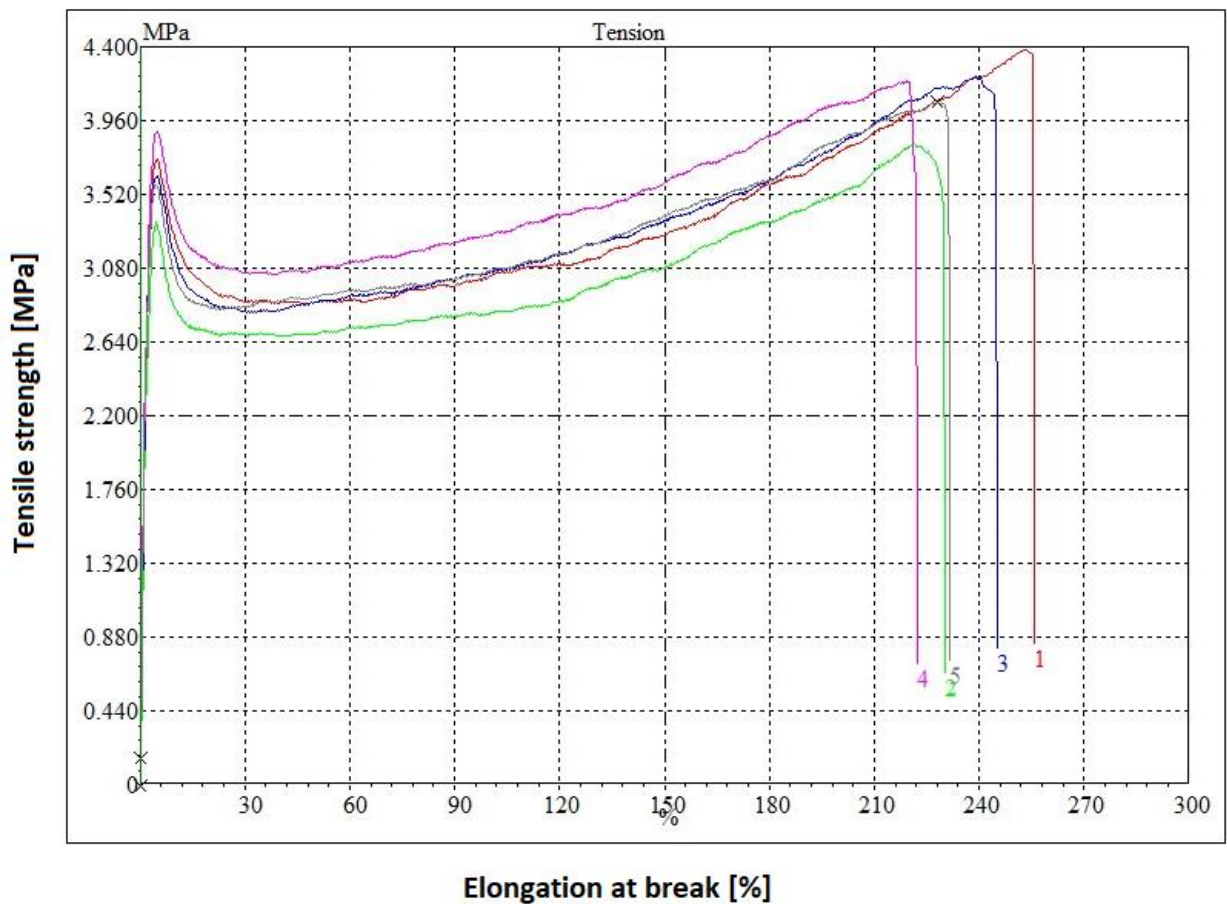



**EVA 19150 + MCC 50%**

Speed: 100.000 mm/min

Extrusion Grinev (Thickness: 1.0 mm) ; +21.8°C, 7.7%HR Test Data: 16-03-2018

Metod

| Test No. | Material          | Width<br>mm | Thick-<br>ness<br>mm | Max.<br>Load<br>MPa | Yield<br>point<br>MPa | Max.<br>Load<br>% | Break<br>MPa | Elastic<br>modulus<br>MPa | Input<br>Grip<br>% | Grip<br>traversa<br>% | Comentary<br>° |
|----------|-------------------|-------------|----------------------|---------------------|-----------------------|-------------------|--------------|---------------------------|--------------------|-----------------------|----------------|
| 1        | 19150 + Cell. 50% | 4.1         | 0.15                 | 1.8                 | 1.8                   | 1.6               | 0.3          | 142.8                     | 3.3                | 1.8                   | NO             |
| 2        | 19150 + Cell. 50% | 4.1         | 0.14                 | 3.0                 | 3.0                   | 2.1               | 0.6          | 212.2                     | 5.0                | 3.3                   | NO             |
| 3        | 19150 + Cell. 50% | 4.1         | 0.16                 | 2.2                 | 2.2                   | 1.7               | 0.4          | 178.7                     | 3.3                | 1.8                   | OK             |
| 4        | 19150 + Cell. 50% | 4.1         | 0.15                 | 2.1                 | 2.1                   | 1.7               | 0.4          | 149.9                     | 3.3                | 2.2                   | NO             |
| 5        | 19150 + Cell. 50% | 4.1         | 0.16                 | 3.1                 | 3.1                   | 2.1               | 0.5          | 208.7                     | 5.0                | 2.9                   | NO             |
| ---      | ---               | ---         | ---                  | ---                 | ---                   | ---               | ---          | ---                       | ---                | ---                   | ---            |
| Avera    | ---               | 4.1         | 0.15                 | 2.4                 | 2.4                   | 1.8               | 0.4          | 178.5                     | 4.0                | 2.4                   | ---            |
| SD(N)    | ---               | 0.0         | 0.01                 | 0.5                 | 0.5                   | 0.2               | 0.1          | 28.8                      | 0.8                | 0.6                   | ---            |
| CV%      | ---               | 0.0         | 4.92                 | 21.2                | 21.2                  | 11.7              | 23.2         | 16.1                      | 20.9               | 25.1                  | ---            |

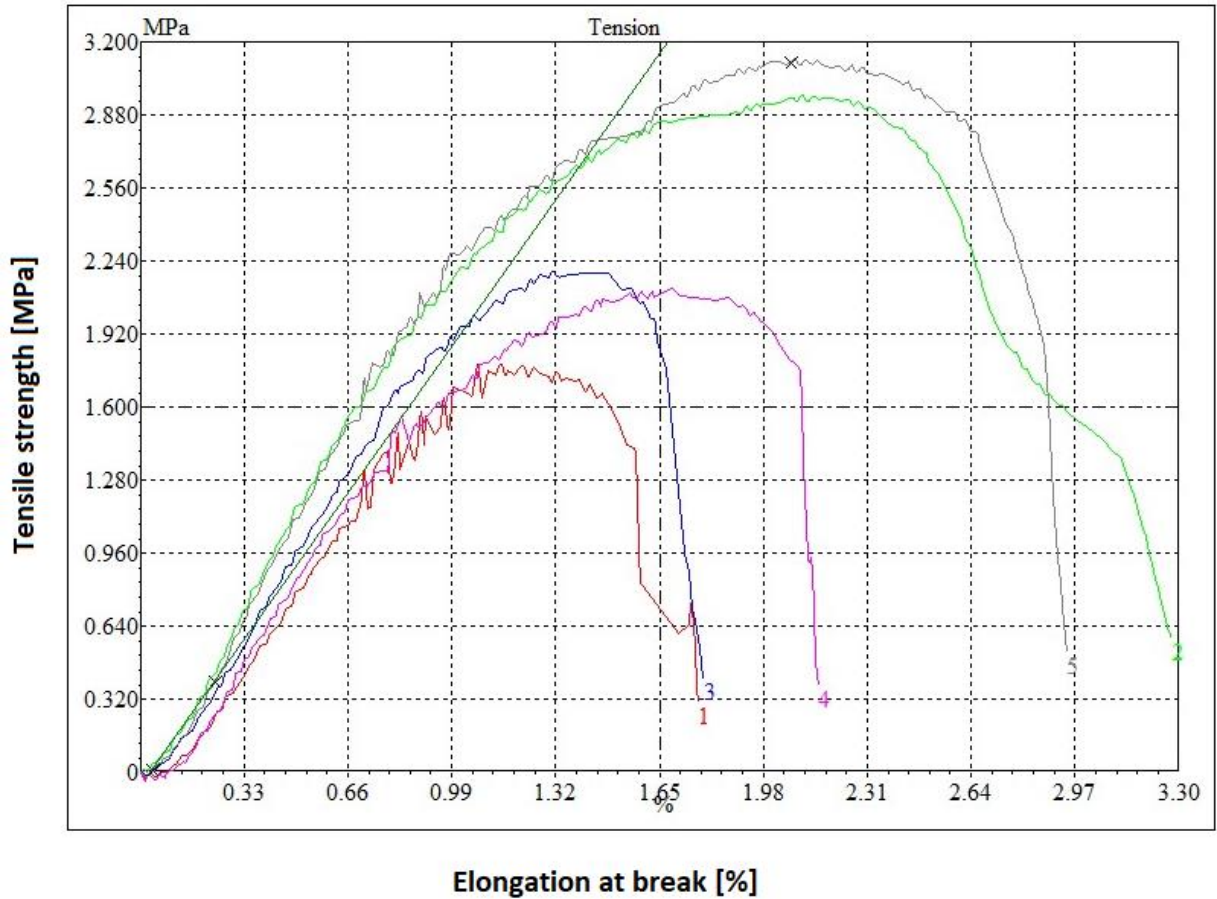



# EVA 15006 + MCC 50%

Speed: 100.000 mm/min

Extrusion Grinev (Thickness: 1.0 mm) ; +21.8°C, 7.7%HR Test Data: 16-03-2018

Metod

| Test No. | Material          | Width<br>mm | Thick-<br>ness<br>mm | Max.<br>Load<br>MPa | Yield<br>point<br>MPa | Max.<br>Load<br>% | Break<br>MPa | Elastic<br>modulus<br>MPa | Input<br>Grip<br>% | Grip<br>traversa<br>% | Comentary<br>° |
|----------|-------------------|-------------|----------------------|---------------------|-----------------------|-------------------|--------------|---------------------------|--------------------|-----------------------|----------------|
| 1        | 15006 + Cell. 50% | 4.1         | 0.28                 | 4.7                 | 4.7                   | 2.3               | 0.9          | 269.9                     | 10.0               | 8.3                   | OK             |
| 2        | 15006 + Cell. 50% | 4.1         | 0.27                 | 4.7                 | 4.7                   | 2.4               | 0.9          | 474.2                     | 10.0               | 7.6                   | OK             |
| 3        | 15006 + Cell. 50% | 4.1         | 0.27                 | 4.9                 | 4.9                   | 2.3               | 1.0          | 240.6                     | 8.3                | 6.4                   | NO             |
| 4        | 15006 + Cell. 50% | 4.1         | 0.29                 | 5.3                 | 5.3                   | 2.7               | 1.0          | 229.3                     | 10.0               | 8.1                   | NO             |
| 5        | 15006 + Cell. 50% | 4.1         | 0.25                 | 0.1                 | 0.1                   | -                 | 0.1          | -                         | 10.0               | 0.6                   | NO             |
| 6        | 15006 + Cell. 50% | 4.1         | 0.25                 | 5.3                 | 5.3                   | 2.5               | 0.7          | 284.8                     | 8.3                | 6.9                   | NO             |
| Avera    | ---               | 4.1         | 0.27                 | 5.0                 | 5.0                   | 2.4               | 0.9          | 299.8                     | 9.3                | 7.5                   | ---            |
| SD(N)    | ---               | 0.0         | 0.01                 | 0.3                 | 0.3                   | 0.1               | 0.1          | 89.5                      | 0.8                | 0.7                   | ---            |
| CV%      | ---               | 0.0         | 4.88                 | 5.4                 | 5.4                   | 6.1               | 12.2         | 29.8                      | 8.9                | 9.6                   | ---            |

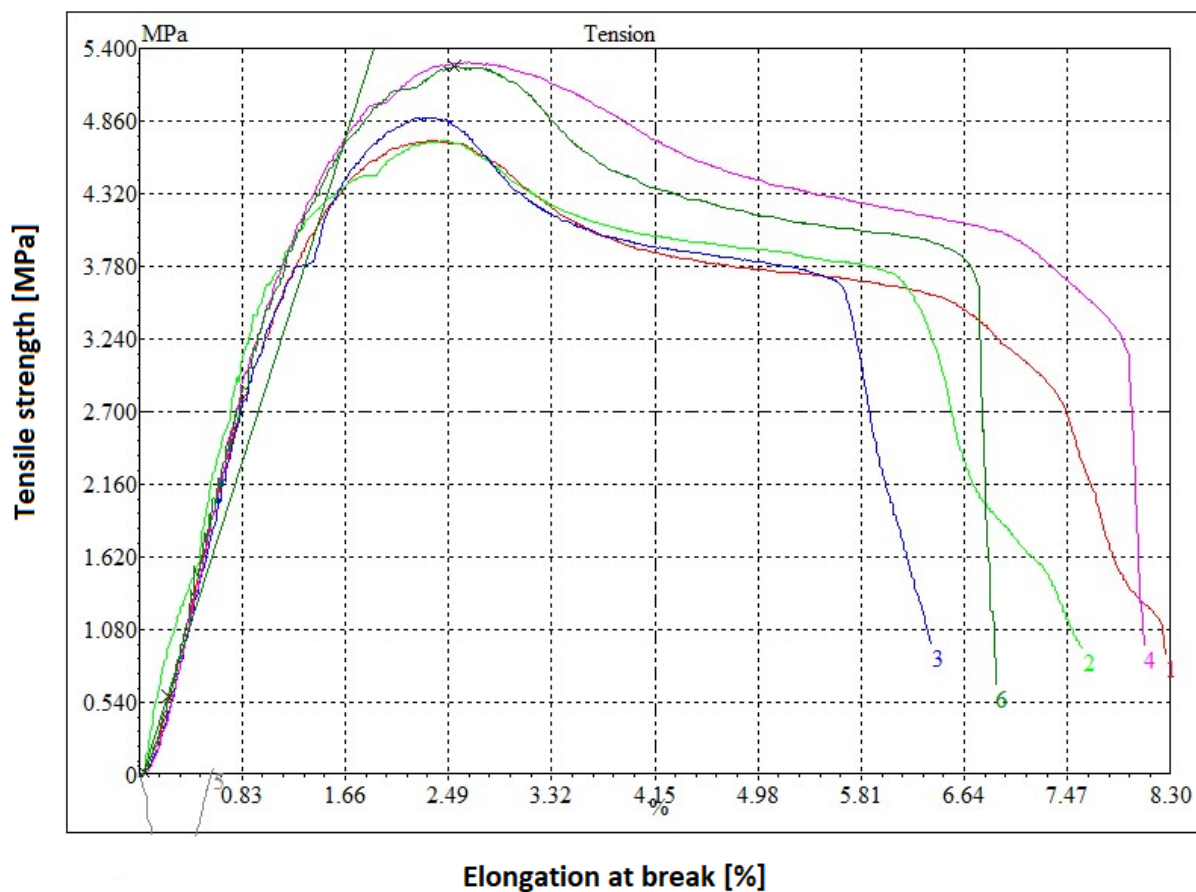

**EVA 28150 + MCC 60%**

Speed: 100.000 mm/min

Extrusion Grinev (Thickness: 1.0 mm) ; +21.8°C, 7.7%HR Test Data: 28-03-2018

Metod Extension #75

| Test No. | Material           | Width<br>mm | Thick<br>ness<br>mm | Max.<br>Load<br>MPa | Yield<br>point<br>MPa | Max.<br>Load<br>% | Break<br>MPa | Elastic<br>modulus<br>MPa | Input<br>Grip<br>% | Grip<br>traversa<br>% | Comentary<br>° |
|----------|--------------------|-------------|---------------------|---------------------|-----------------------|-------------------|--------------|---------------------------|--------------------|-----------------------|----------------|
| 1        | EVA 28150+Cell 60% | 4.1         | 0.30                | 3.4                 | 3.4                   | 2.9               | 0.7          | 139.8                     | 5.0                | 5.0                   | NO             |
| 2        | EVA 28150+Cell 60% | 4.1         | 0.31                | 3.3                 | 3.3                   | 2.6               | 0.6          | 281.0                     | 3.3                | 4.2                   | NO             |
| 3        | EVA 28150+Cell 60% | 4.1         | 0.32                | 2.9                 | 2.9                   | 2.6               | 0.6          | 215.9                     | 5.0                | 5.9                   | OK             |
| 4        | EVA 28150+Cell 60% | 4.1         | 0.32                | 3.3                 | 3.3                   | 2.4               | 0.6          | 267.1                     | 3.3                | 4.0                   | NO             |
| ---      | ---                | ---         | ---                 | ---                 | ---                   | ---               | ---          | ---                       | ---                | ---                   | ---            |
| ---      | ---                | ---         | ---                 | ---                 | ---                   | ---               | ---          | ---                       | ---                | ---                   | ---            |
| Avera    | ---                | 4.1         | 0.31                | 3.2                 | 3.2                   | 2.6               | 0.6          | 226.0                     | 4.2                | 4.8                   | ---            |
| SD(N)    | ---                | 0.0         | 0.01                | 0.2                 | 0.2                   | 0.2               | 0.0          | 55.3                      | 0.8                | 0.7                   | ---            |
| CV%      | ---                | 0.0         | 2.65                | 6.0                 | 6.0                   | 6.8               | 6.9          | 24.5                      | 20.5               | 15.7                  | ---            |

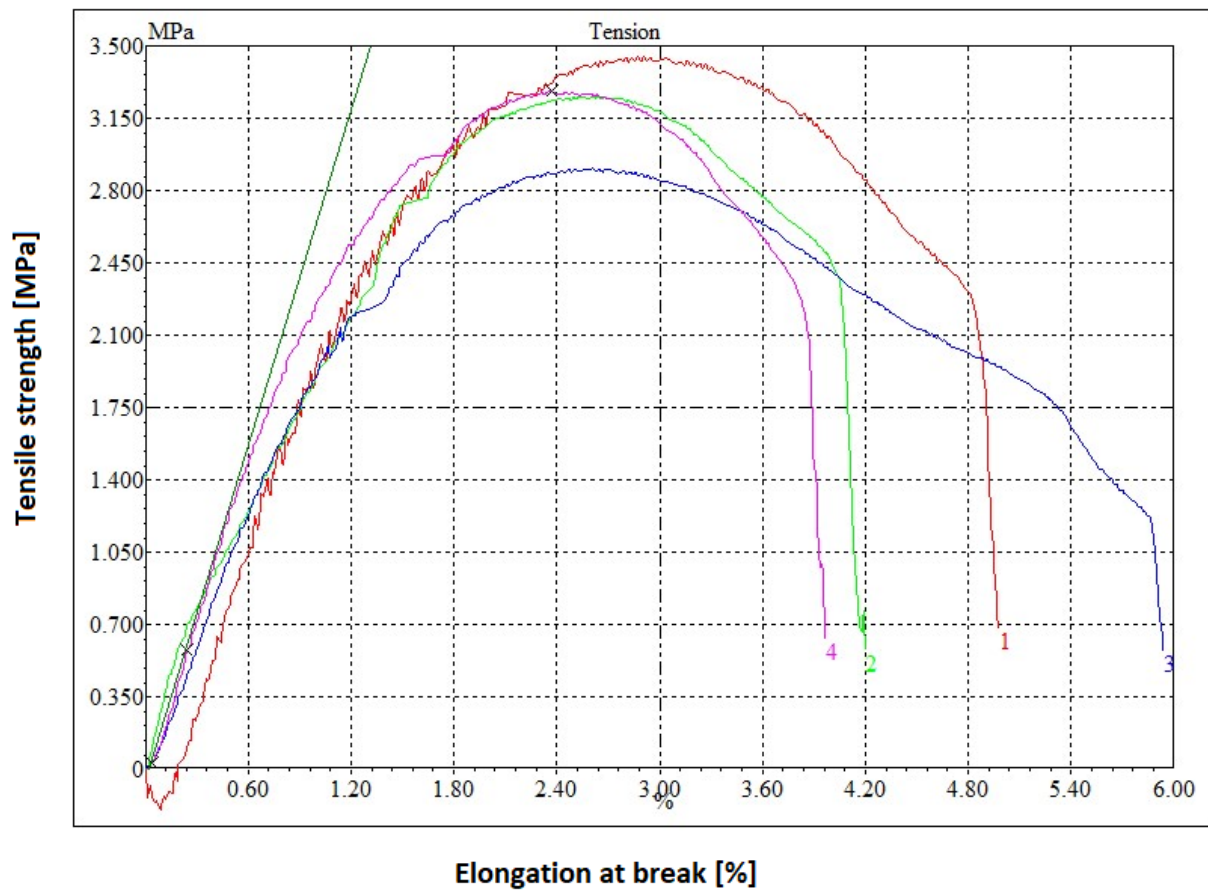

**EVA 28025 + MCC 60%**

Speed: 100.000 mm/min

Extrusion Grinev (Thickness: 1.0 mm) ; +21.8°C, 7.7%HR Test Data: 28-03-2018

Metod Extension #75

| Test No. | Material           | Width | Thick ness | Max. Load | Yeild point | Max. Load | Break | Elastic modulus | Input Grip | Grip traversa | Comentary |
|----------|--------------------|-------|------------|-----------|-------------|-----------|-------|-----------------|------------|---------------|-----------|
|          |                    | mm    | mm         | MPa       | MPa         | %         | MPa   | MPa             | %          | %             | o         |
| 1        | EVA 28025+Cell 60% | 4.1   | 0.28       | 4.6       | 4.6         | 3.1       | 0.9   | 271.7           | 6.7        | 6.4           | NO        |
| 2        | EVA 28025+Cell 60% | 4.1   | 0.29       | 4.4       | 4.4         | 3.1       | 0.8   | 270.1           | 8.3        | 9.4           | OK        |
| 3        | EVA 28025+Cell 60% | 4.1   | 0.30       | 4.5       | 4.5         | 3.1       | 0.9   | 260.8           | 6.7        | 7.0           | OK        |
| ---      | ---                | ---   | ---        | ---       | ---         | ---       | ---   | ---             | ---        | ---           | ---       |
| ---      | ---                | ---   | ---        | ---       | ---         | ---       | ---   | ---             | ---        | ---           | ---       |
| ---      | ---                | ---   | ---        | ---       | ---         | ---       | ---   | ---             | ---        | ---           | ---       |
| Avera    | ---                | 4.1   | 0.29       | 4.5       | 4.5         | 3.1       | 0.9   | 267.5           | 7.2        | 7.6           | ---       |
| SD(N)    | ---                | 0.0   | 0.01       | 0.1       | 0.1         | 0.0       | 0.0   | 4.8             | 0.8        | 1.3           | ---       |
| CV%      | ---                | 0.0   | 2.82       | 1.8       | 1.8         | 0.0       | 5.4   | 1.8             | 10.4       | 17.1          | ---       |

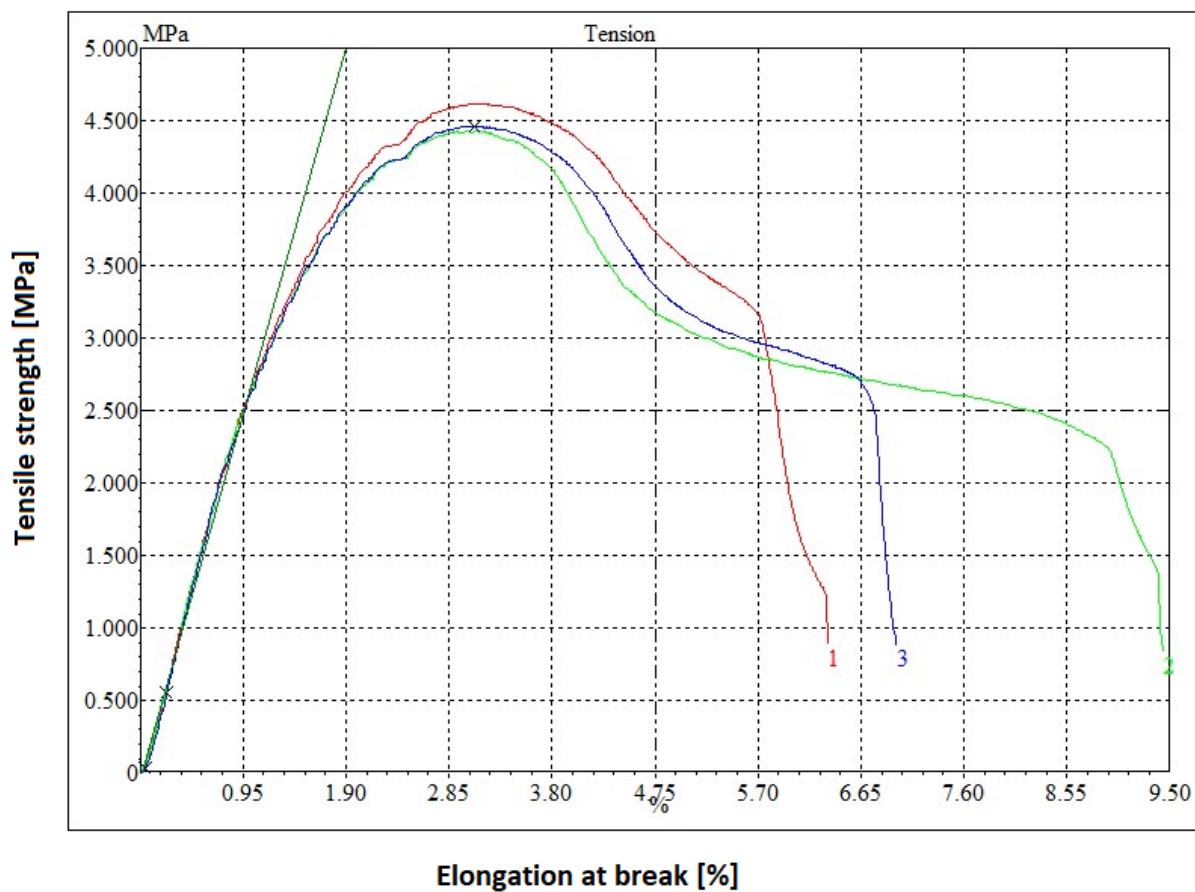



# EVA 28005 + MCC 60%

Speed: 100.000 mm/min

Extrusion Grinev (Thickness: 1.0 mm) ; +21.8°C, 7.7%HR Test Data: 28-03-2018

Metod Extension #75

| Test No. | Material           | Width<br>mm | Thick<br>ness<br>mm | Max.<br>Load<br>MPa | Yeild<br>point<br>MPa | Max.<br>Load<br>% | Break<br>MPa | Elastic<br>modulus<br>MPa | Input<br>Grip<br>% | Grip<br>traversa<br>% | Comentary<br>° |
|----------|--------------------|-------------|---------------------|---------------------|-----------------------|-------------------|--------------|---------------------------|--------------------|-----------------------|----------------|
| 1        | EVA 28005+Cell 60% | 4.1         | 0.39                | 4.6                 | 4.6                   | 2.8               | 0.7          | 221.7                     | 60.0               | 61.4                  | NO             |
| 2        | EVA 28005+Cell 60% | 4.1         | 0.34                | 4.7                 | 4.7                   | 2.7               | 0.9          | 395.8                     | 23.3               | 24.1                  | NO             |
| 3        | EVA 28005+Cell 60% | 4.1         | 0.32                | 4.0                 | 4.0                   | 2.3               | 0.7          | 230.6                     | 45.0               | 44.6                  | NO             |
| ---      | ---                | ---         | ---                 | ---                 | ---                   | ---               | ---          | ---                       | ---                | ---                   | ---            |
| ---      | ---                | ---         | ---                 | ---                 | ---                   | ---               | ---          | ---                       | ---                | ---                   | ---            |
| ---      | ---                | ---         | ---                 | ---                 | ---                   | ---               | ---          | ---                       | ---                | ---                   | ---            |
| Avera    | ---                | 4.1         | 0.35                | 4.4                 | 4.4                   | 2.6               | 0.8          | 282.7                     | 42.8               | 43.4                  | ---            |
| SD(N)    | ---                | 0.0         | 0.03                | 0.3                 | 0.3                   | 0.2               | 0.1          | 80.1                      | 15.1               | 15.3                  | ---            |
| CV%      | ---                | 0.0         | 8.41                | 7.0                 | 7.0                   | 8.3               | 12.3         | 28.3                      | 35.2               | 35.2                  | ---            |

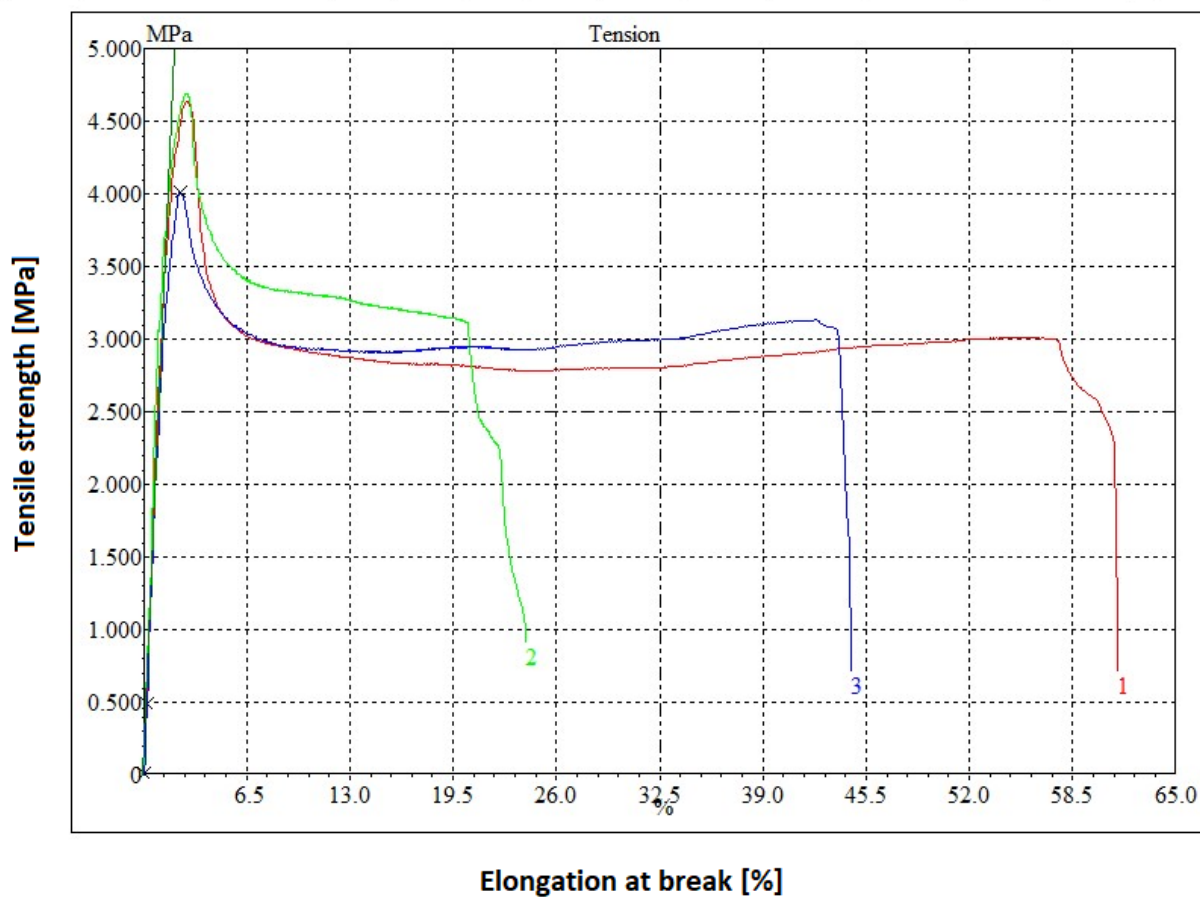

**EVA 19150 + MCC 60%**

Speed: 100.000 mm/min

Extrusion Grinev (Thickness: 1.0 mm) ; +21.8°C, 7.7%HR Test Data: 28-03-2018

Metod Extension #75

| Test No. | Material           | Width<br>mm | Thick<br>ness<br>mm | Max.<br>Load<br>MPa | Yield<br>point<br>MPa | Max.<br>Load<br>% | Break<br>MPa | Elastic<br>modulus<br>MPa | Input<br>Grip<br>% | Grip<br>traversa<br>% | Comentary<br>° |
|----------|--------------------|-------------|---------------------|---------------------|-----------------------|-------------------|--------------|---------------------------|--------------------|-----------------------|----------------|
| 1        | EVA 19150+Cell 60% | 4.1         | 0.23                | 5.6                 | 5.6                   | 1.7               | 1.0          | 599.5                     | 2.5                | 2.3                   | NO             |
| 2        | EVA 19150+Cell 60% | 4.1         | 0.21                | 4.4                 | 4.4                   | -                 | 0.8          | 414.9                     | 1.7                | 1.6                   | NO             |
| 3        | EVA 19150+Cell 60% | 4.1         | 0.23                | 5.4                 | 5.4                   | 1.7               | 0.8          | 589.3                     | 1.7                | 1.8                   | NO             |
| ---      | ---                | ---         | ---                 | ---                 | ---                   | ---               | ---          | ---                       | ---                | ---                   | ---            |
| ---      | ---                | ---         | ---                 | ---                 | ---                   | ---               | ---          | ---                       | ---                | ---                   | ---            |
| ---      | ---                | ---         | ---                 | ---                 | ---                   | ---               | ---          | ---                       | ---                | ---                   | ---            |
| Avera    | ---                | 4.1         | 0.22                | 5.1                 | 5.1                   | 1.7               | 0.9          | 534.6                     | 2.0                | 1.9                   | ---            |
| SD(N)    | ---                | 0.0         | 0.01                | 0.5                 | 0.5                   | 0.0               | 0.1          | 84.7                      | 0.4                | 0.3                   | ---            |
| CV%      | ---                | 0.0         | 4.22                | 10.2                | 10.2                  | 0.0               | 10.9         | 15.8                      | 19.2               | 15.5                  | ---            |

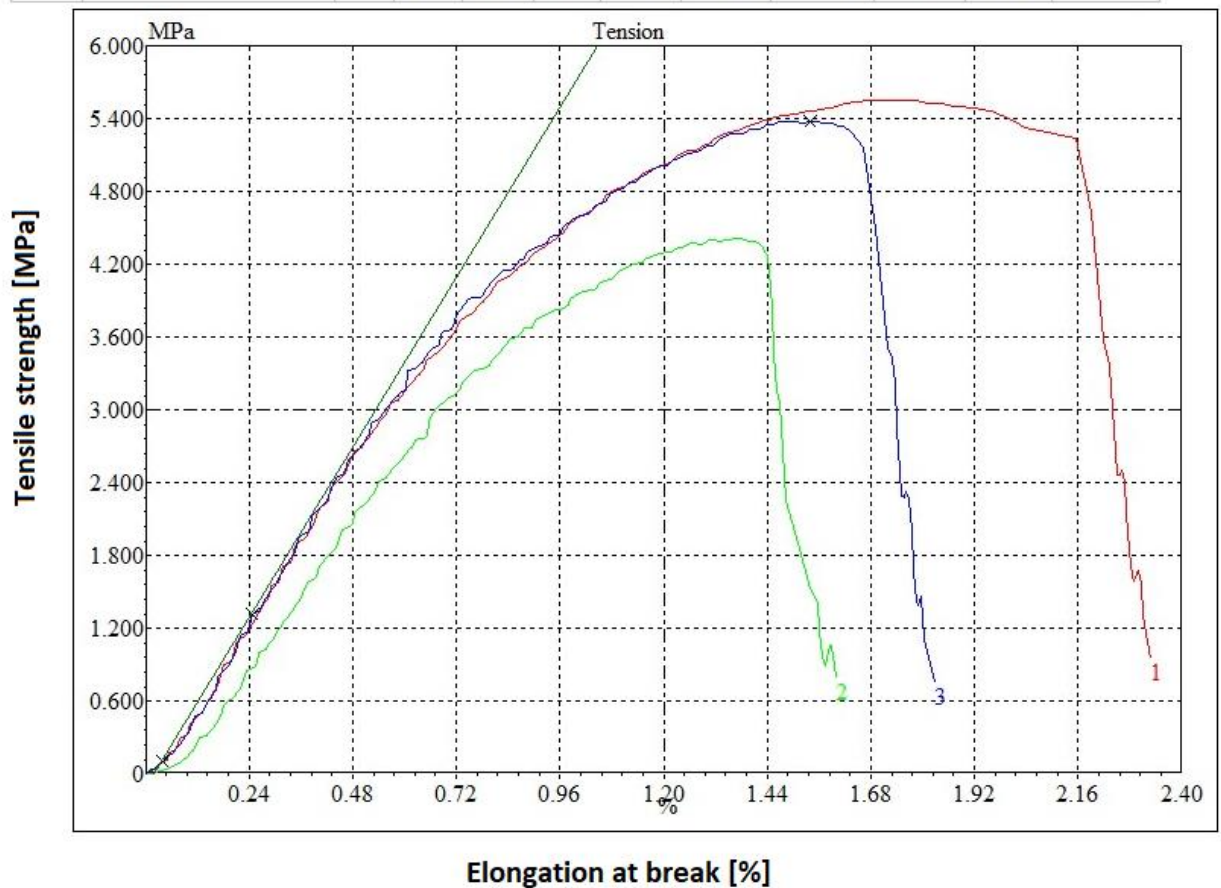

**EVA 15006 + MCC 60%**

Speed: 100.000 mm/min

Extrusion Grinev (Thickness: 1.0 mm) ; +21.8°C, 7.7%HR Test Data: 28-03-2018

Metod Extension #75

| Test No. | Material           | Width<br>mm | Thick<br>ness<br>mm | Max.<br>Load<br>MPa | Yield<br>point<br>MPa | Max.<br>Load<br>% | Break<br>MPa | Elastic<br>modulus<br>MPa | Input<br>Grip<br>% | Grip<br>traversa<br>% | Comentary<br>° |
|----------|--------------------|-------------|---------------------|---------------------|-----------------------|-------------------|--------------|---------------------------|--------------------|-----------------------|----------------|
| 1        | EVA 15006+Cell 60% | 4.1         | 0.35                | 4.7                 | 4.7                   | 1.7               | 0.9          | 579.4                     | 3.3                | 2.9                   | NO             |
| 2        | EVA 15006+Cell 60% | 4.1         | 0.32                | 5.4                 | 5.4                   | 1.7               | 0.8          | 460.7                     | 1.7                | 2.8                   | NO             |
| 3        | EVA 15006+Cell 60% | 4.1         | 0.32                | 5.1                 | 5.1                   | 1.7               | 1.0          | 537.1                     | 3.3                | 3.2                   | NO             |
| ---      | ---                | ---         | ---                 | ---                 | ---                   | ---               | ---          | ---                       | ---                | ---                   | ---            |
| ---      | ---                | ---         | ---                 | ---                 | ---                   | ---               | ---          | ---                       | ---                | ---                   | ---            |
| ---      | ---                | ---         | ---                 | ---                 | ---                   | ---               | ---          | ---                       | ---                | ---                   | ---            |
| Avera    | ---                | 4.1         | 0.33                | 5.1                 | 5.1                   | 1.7               | 0.9          | 525.7                     | 2.8                | 3.0                   | ---            |
| SD(N)    | ---                | 0.0         | 0.01                | 0.3                 | 0.3                   | 0.0               | 0.1          | 49.1                      | 0.8                | 0.2                   | ---            |
| CV%      | ---                | 0.0         | 4.29                | 5.7                 | 5.7                   | 0.0               | 9.1          | 9.3                       | 27.3               | 5.7                   | ---            |

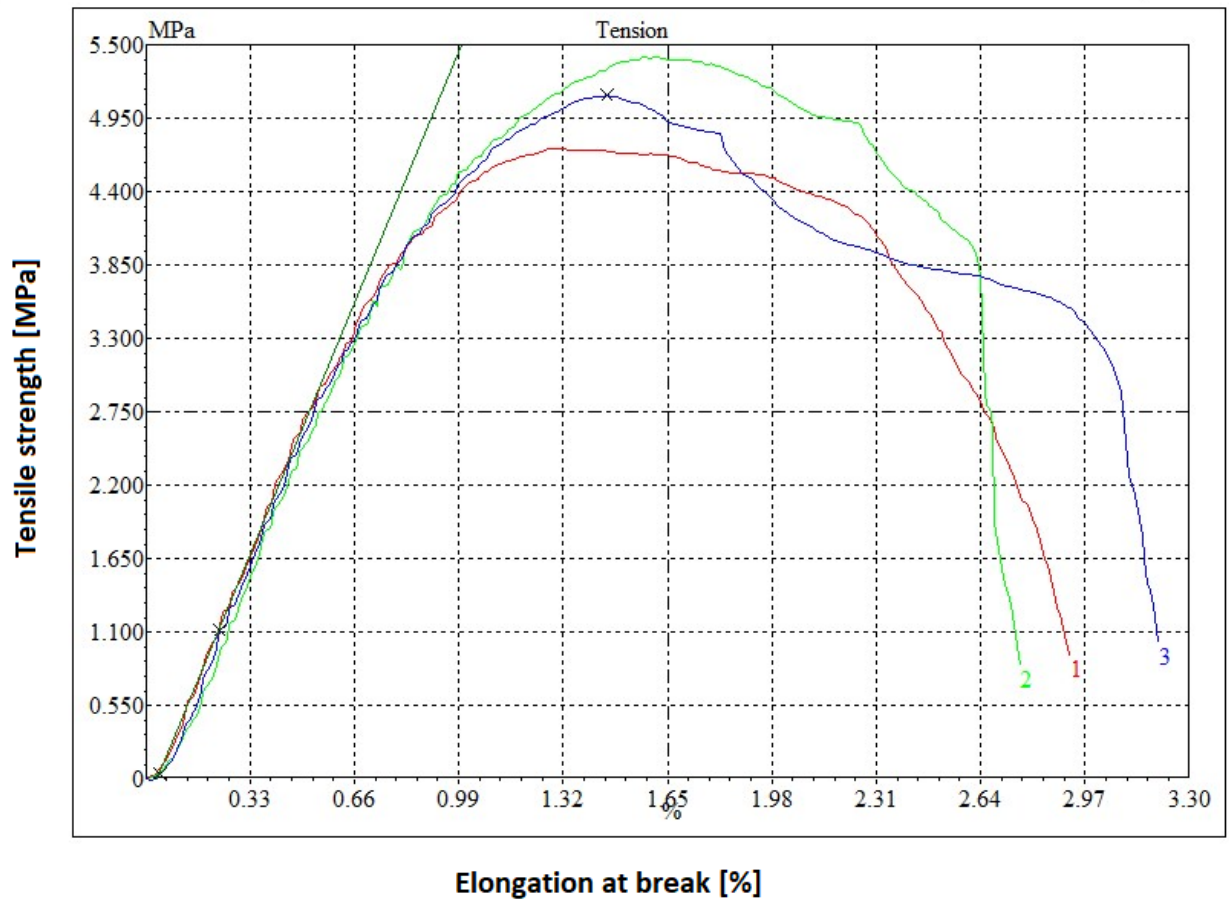



# EVA 28150 + MCC 70%

Speed 100.000 mm/min

23°C, 35.5HR%, Test Data: 06-04-2018

Metod Extention Film

| Test No. | Material  |             |  | Width | Thick-<br>ness | Max.<br>Load | Max.<br>Load | Yield<br>point | Elastic<br>modulus | Comments       |
|----------|-----------|-------------|--|-------|----------------|--------------|--------------|----------------|--------------------|----------------|
|          |           |             |  | mm    | mm             | N            | MPa          | MPa            | MPa                | °              |
| 1        | EVA 28150 | Cell. (70%) |  | 10.0  | 0.950          | 31.3         | 3.3          | 3.3            | 174.5              | NO             |
| 2        | EVA 28150 | Cell. (70%) |  | 10.0  | 0.940          | 29.8         | 3.2          | 3.2            | 91.6               | NO             |
| 3        | EVA 28150 | Cell. (70%) |  | 10.0  | 0.930          | 27.2         | 2.9          | 2.9            | 57.6               | NO             |
| 4        | EVA 28150 | Cell. (70%) |  | 10.0  | 0.850          | 19.6         | 2.3          | 2.3            | 176.0              | Drugoi obrazec |
| ---      | ---       |             |  | ---   | ---            | ---          | ---          | ---            | ---                | ---            |
| Aver     | ---       |             |  | 10.0  | 0.917          | 27.0         | 2.9          | 2.9            | 124.9              | ---            |
| SD(N)    | ---       |             |  | 0.0   | 0.040          | 4.5          | 0.4          | 0.4            | 51.7               | ---            |
| CV%      | ---       |             |  | 0.0   | 4.317          | 16.7         | 13.3         | 13.3           | 41.4               | ---            |

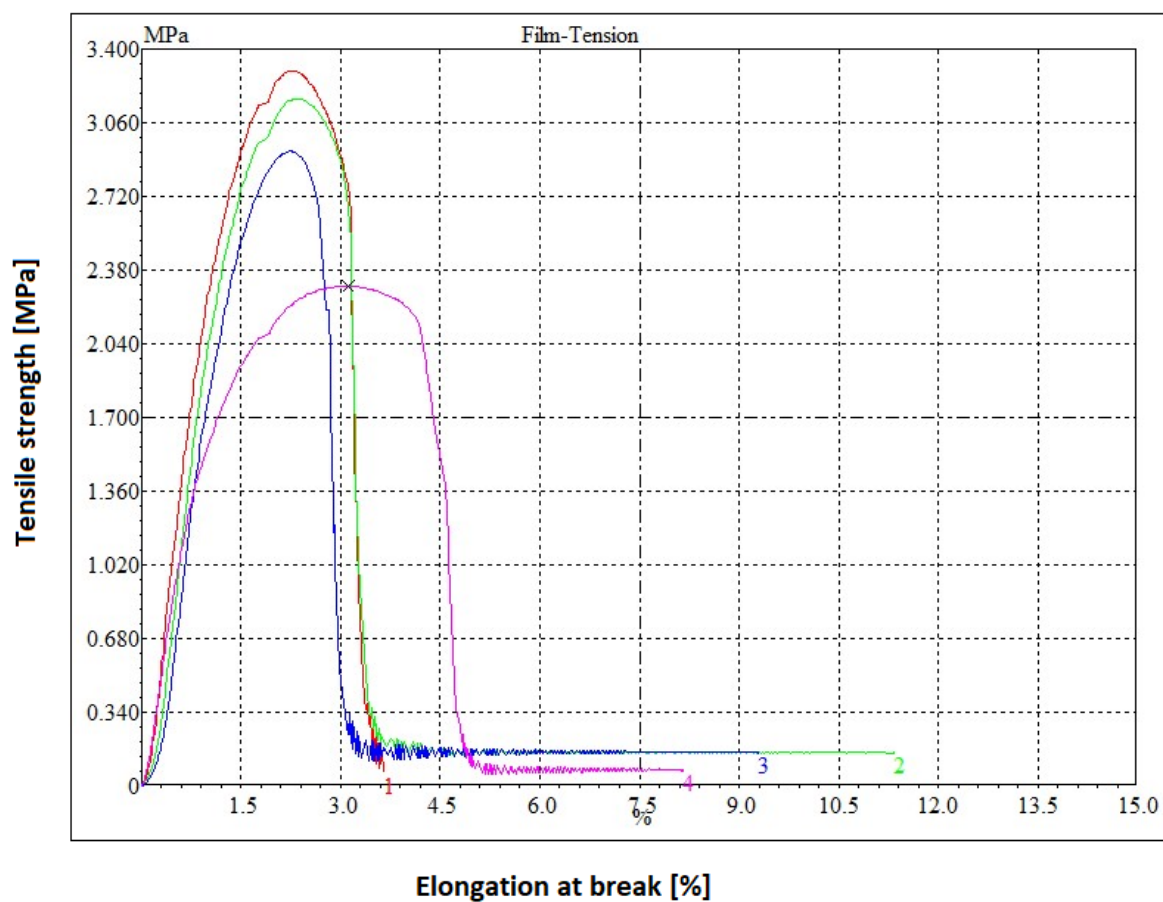

**EVA 28025 + MCC 70%**

Speed 100.000 mm/min

23°C, 26.5HR%, Test Data: 06-04-2018

Metod Extention Film

| Test No. | Material                | Width<br>mm | Thick-<br>ness<br>mm | Max.<br>Load<br>N | Max.<br>Load<br>MPa | Yield<br>point<br>MPa | Elastic<br>modulus<br>MPa | Comments       |
|----------|-------------------------|-------------|----------------------|-------------------|---------------------|-----------------------|---------------------------|----------------|
| 1        | EVA 28025 + Cell. (70%) | 10.0        | 0.800                | 29.8              | 3.7                 | 3.7                   | 91.1                      | 63             |
| 2        | EVA 28025 + Cell. (70%) | 10.0        | 0.800                | 34.1              | 4.3                 | 4.3                   | 183.6                     |                |
| 3        | EVA 28025 + Cell. (70%) | 10.0        | 0.790                | 24.7              | 3.1                 | 3.1                   | 170.4                     |                |
| 4        | EVA 28025 + Cell. (70%) | 10.0        | 0.460                | 16.2              | 3.5                 | 3.5                   | 278.8                     | drugoi obrazec |
| Aver     | ---                     | 10.0        | 0.713                | 26.2              | 3.6                 | 3.6                   | 181.0                     | ---            |
| SD(N)    | ---                     | 0.0         | 0.146                | 6.7               | 0.4                 | 0.4                   | 66.6                      | ---            |
| CV%      | ---                     | 0.0         | 20.469               | 25.4              | 11.9                | 11.9                  | 36.8                      | ---            |

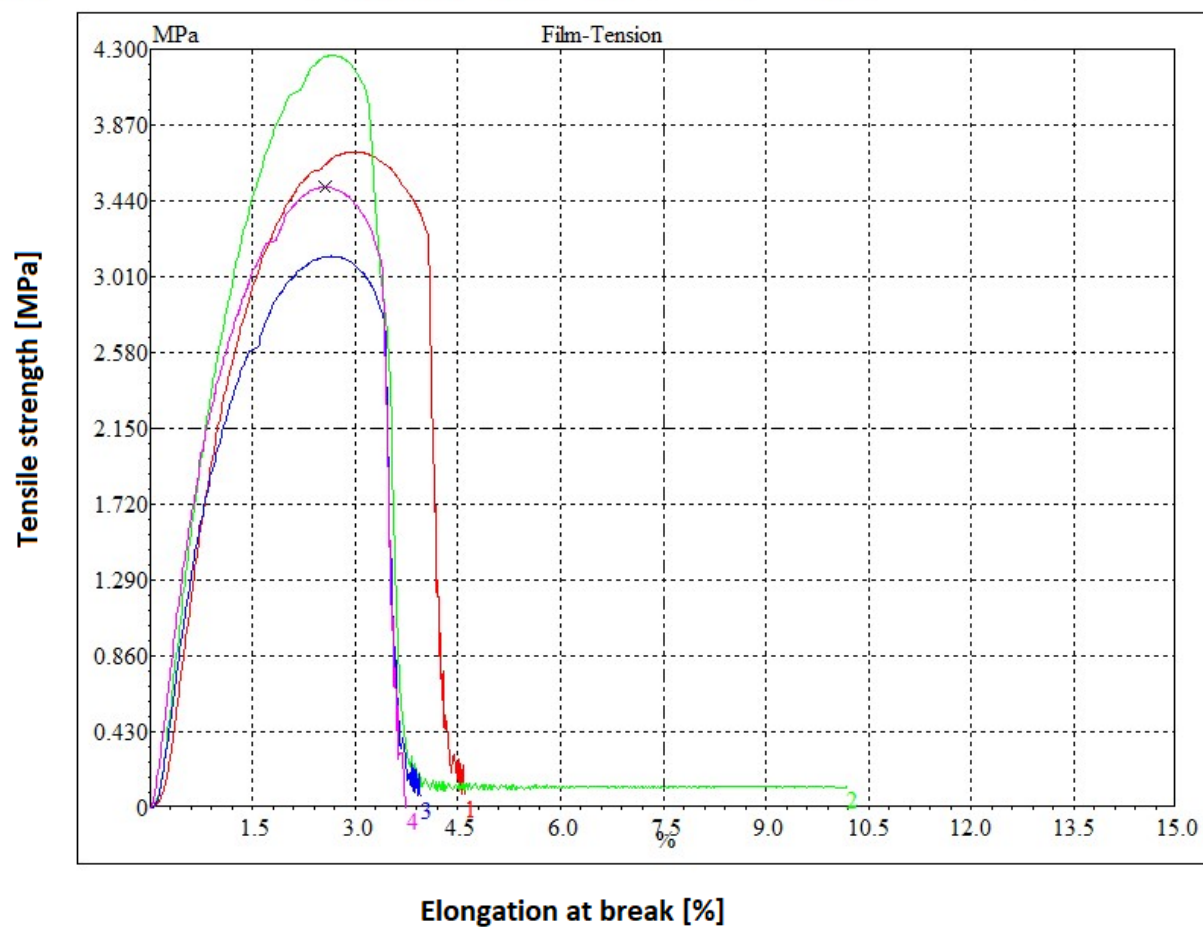

**EVA 28005 + MCC 70%**

Speed 100.000 mm/min

23°C, 26.5HR%, Test Data: 06-04-2018

Metod Extention Film

| Test No. | Material                | Width<br>mm | Thick-<br>ness<br>mm | Max.<br>Load<br>N | Max.<br>Load<br>MPa | Yield<br>point<br>MPa | Elastic<br>modulus<br>MPa | Comments<br>° |
|----------|-------------------------|-------------|----------------------|-------------------|---------------------|-----------------------|---------------------------|---------------|
| 1        | EVA 28005 + Cell. (70%) | 10.0        | 0.440                | 18.6              | 4.2                 | 4.2                   | 70.2                      | ok            |
| 2        | EVA 28005 + Cell. (70%) | 10.0        | 0.560                | 25.9              | 4.6                 | 4.6                   | 330.1                     | ok            |
| 3        | EVA 28005 + Cell. (70%) | 10.0        | 0.450                | 19.9              | 4.4                 | 4.4                   | 183.1                     | ok            |
| 4        | EVA 28005 + Cell. (70%) | 10.0        | 0.400                | 17.3              | 4.3                 | 4.3                   | 255.5                     | drugoi        |
| Aver     | ---                     | 10.0        | 0.463                | 20.4              | 4.4                 | 4.4                   | 209.7                     | ---           |
| SD(N)    | ---                     | 0.0         | 0.059                | 3.3               | 0.1                 | 0.1                   | 95.9                      | ---           |
| CV%      | ---                     | 0.0         | 12.826               | 16.1              | 3.4                 | 3.4                   | 45.7                      | ---           |

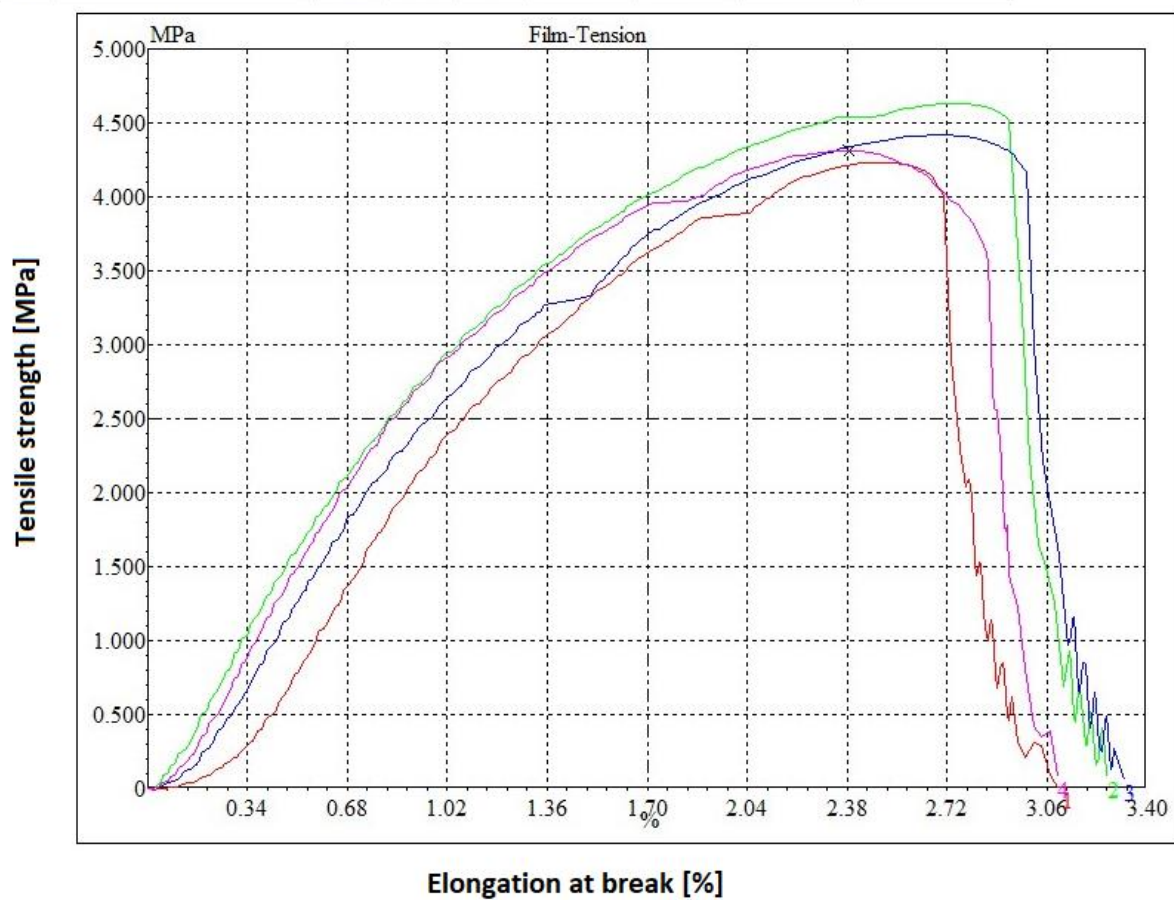



# EVA 19150 + MCC 70%

Speed 100.000 mm/min

23°C, 26.5HR%, Test Data: 06-04-2018

Metod Extension Film

| Test No. | Material                | Width<br>mm | Thick-<br>ness<br>mm | Max.<br>Load<br>N | Max.<br>Load<br>MPa | Yield<br>point<br>MPa | Elastic<br>modulus<br>MPa | Comments       |
|----------|-------------------------|-------------|----------------------|-------------------|---------------------|-----------------------|---------------------------|----------------|
| 1        | EVA 19150 + Cell. (70%) | 10.0        | 1.000                | 16.4              | 1.6                 | 1.5                   | 121.9                     | no             |
| 2        | EVA 19150 + Cell. (70%) | 10.0        | 1.000                | 31.0              | 3.1                 | 3.1                   | 151.9                     |                |
| 3        | EVA 19150 + Cell. (70%) | 10.0        | 0.860                | 12.1              | 1.4                 | 1.4                   | 233.8                     | Drugoi obrazec |
| 4        | EVA 19150 + Cell. (70%) | 10.0        | 0.910                | 14.0              | 1.5                 | 1.4                   | 116.7                     |                |
| Aver     | ---                     | 10.0        | 0.943                | 18.4              | 1.9                 | 1.9                   | 156.1                     | ---            |
| SD(N)    | ---                     | 0.0         | 0.060                | 7.4               | 0.7                 | 0.7                   | 46.8                      | ---            |
| CV%      | ---                     | 0.0         | 6.383                | 40.5              | 36.7                | 39.1                  | 30.0                      | ---            |

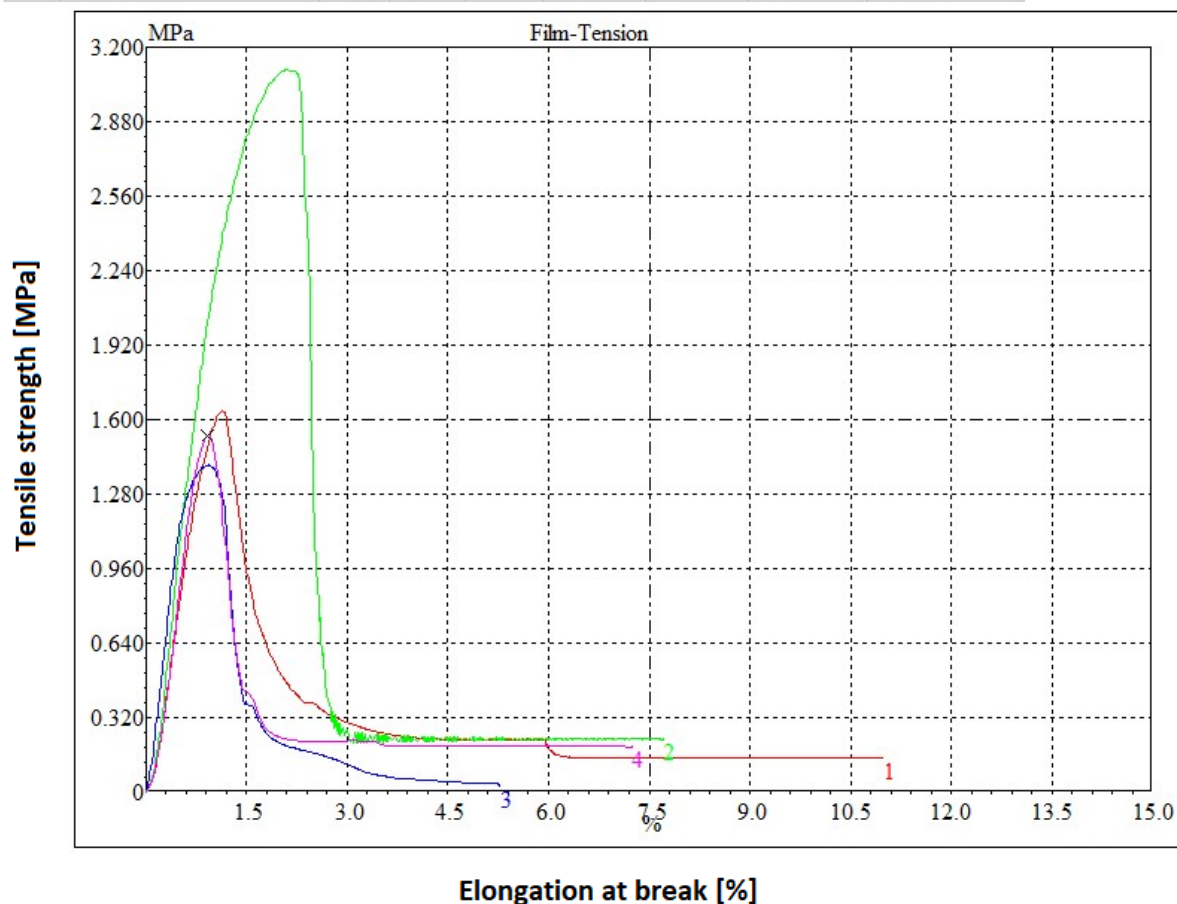

**EVA 15006 + MCC 70%**

Speed 100.000 mm/min

23°C, 26.5HR%, Test Data: 06-04-2018

Metod Extention Film

| Test No. | Material                | Width<br>mm | Thick-<br>ness<br>mm | Max.<br>Load<br>N | Max.<br>Load<br>MPa | Yield<br>point<br>MPa | Elastic<br>modulus<br>MPa | Comments<br>°  |
|----------|-------------------------|-------------|----------------------|-------------------|---------------------|-----------------------|---------------------------|----------------|
| 1        | EVA 15006 + Cell. (70%) | 10.0        | 0.540                | 32.9              | 6.1                 | 5.7                   | 70.3                      |                |
| 2        | EVA 15006 + Cell. (70%) | 10.0        | 0.570                | 25.7              | 4.5                 | 4.3                   | 85.3                      |                |
| 3        | EVA 15006 + Cell. (70%) | 10.0        | 0.530                | 29.3              | 5.5                 | 5.1                   | 205.6                     |                |
| 4        | EVA 15006 + Cell. (70%) | 10.0        | 0.440                | 16.4              | 3.7                 | 3.6                   | 428.6                     | Drugoi obrazec |
| Aver     | ---                     | 10.0        | 0.520                | 26.1              | 5.0                 | 4.7                   | 197.4                     | ---            |
| SD(N)    | ---                     | 0.0         | 0.048                | 6.1               | 0.9                 | 0.8                   | 143.4                     | ---            |
| CV%      | ---                     | 0.0         | 9.322                | 23.5              | 18.6                | 17.0                  | 72.6                      | ---            |

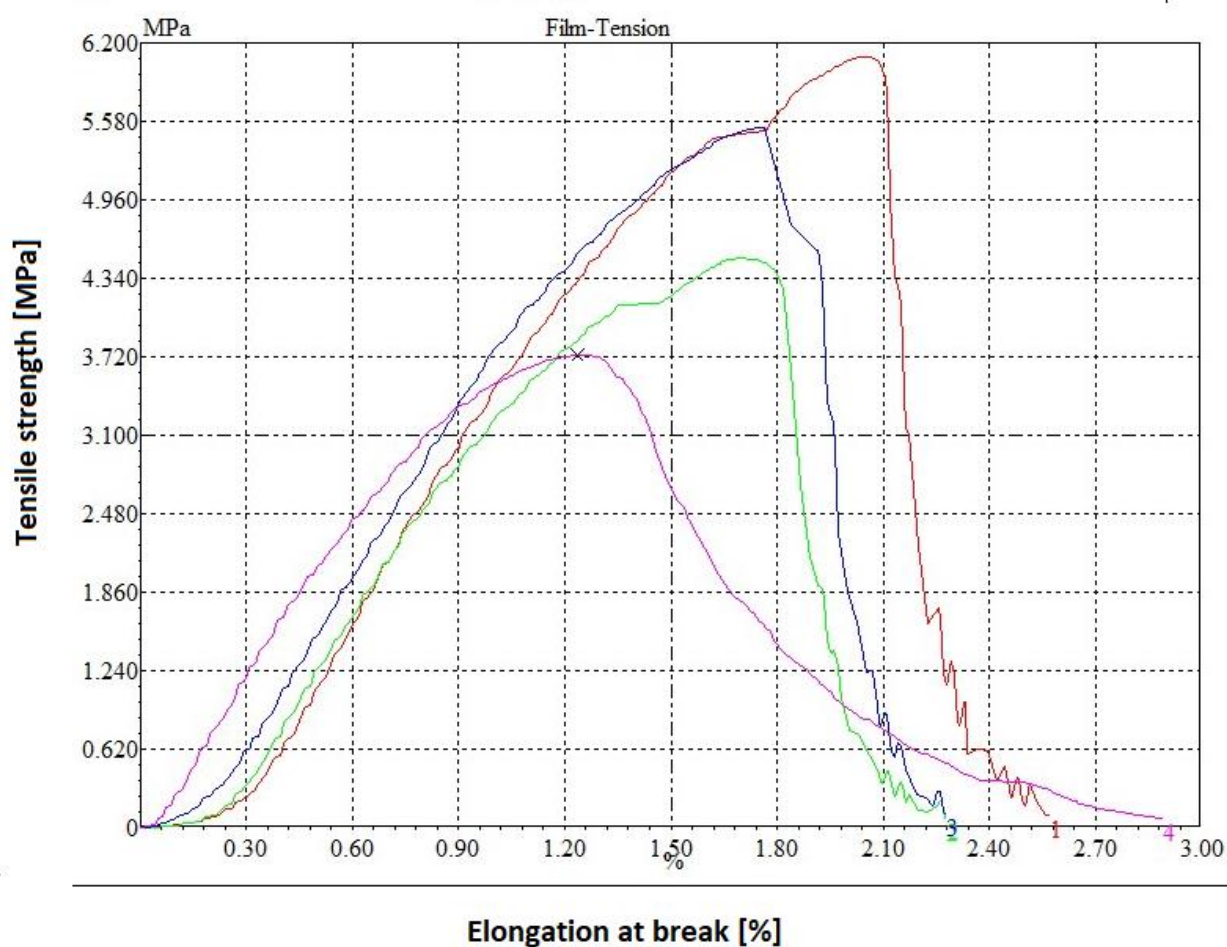

**EVA 28150 + WF 50%**

Speed: 100.000 mm/min

Extrusion Grinev (Thickness: 1.0 mm) ; +21.8°C, 7.7%HR Test Data: 05-12-2017

Metod Extension#75

| Test No. | Material               | Width<br>mm | Thick<br>ness<br>mm | Max.<br>Load<br>MPa | Yeild<br>point<br>MPa | Max.<br>Load<br>% | Break<br>MPa | Elastic<br>modulus<br>MPa | Input<br>Grip<br>% | Grip<br>traversa<br>% | Comentary<br>o |
|----------|------------------------|-------------|---------------------|---------------------|-----------------------|-------------------|--------------|---------------------------|--------------------|-----------------------|----------------|
| 1        | EVA 28150 + W.F. (50%) | 4.1         | 0.41                | 2.3                 | 2.3                   | 2.8               | 0.6          | 192.1                     | 6.7                | 6.2                   | OK             |
| 2        | EVA 28150 + W.F. (50%) | 4.1         | 0.36                | 2.6                 | 2.6                   | 2.8               | 0.8          | 192.5                     | 11.7               | 10.8                  | NO             |
| 3        | EVA 28150 + W.F. (50%) | 4.1         | 0.38                | 2.5                 | 2.5                   | 3.0               | 0.7          | 197.6                     | 16.7               | 16.4                  | NO             |
| 4        | EVA 28150 + W.F. (50%) | 4.1         | 0.35                | 2.5                 | 2.5                   | 2.7               | 0.7          | 179.1                     | 15.0               | 16.1                  | OK             |
| ---      | ---                    | ---         | ---                 | ---                 | ---                   | ---               | ---          | ---                       | ---                | ---                   | ---            |
| ---      | ---                    | ---         | ---                 | ---                 | ---                   | ---               | ---          | ---                       | ---                | ---                   | ---            |
| Avera    | ---                    | 4.1         | 0.38                | 2.5                 | 2.5                   | 2.8               | 0.7          | 190.3                     | 12.5               | 12.4                  | ---            |
| SD(N)    | ---                    | 0.0         | 0.02                | 0.1                 | 0.1                   | 0.1               | 0.1          | 6.8                       | 3.8                | 4.2                   | ---            |
| CV%      | ---                    | 0.0         | 6.11                | 4.4                 | 4.4                   | 3.9               | 10.1         | 3.6                       | 30.4               | 34.0                  | ---            |

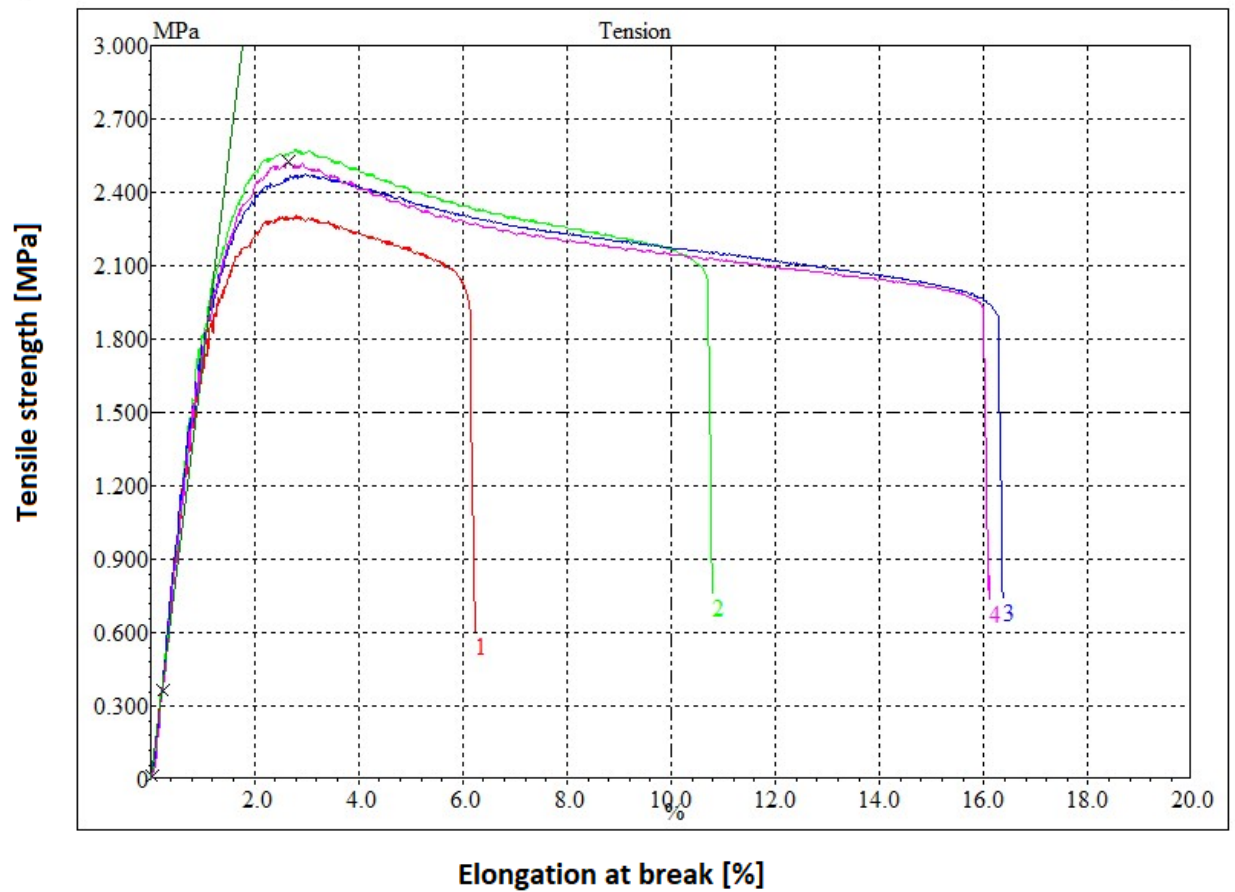



**EVA 28025 + W.F. (50%)**

Speed: 100.000 mm/min

Extrusion Grinev (Thickness: 1.0 mm) ; +21.8°C, 7.7%HR Test Data: 05-12-2017

Metod Extension#75

| Test No. | Material               | Width<br>mm | Thick<br>ness<br>mm | Max.<br>Load<br>MPa | Yield<br>point<br>MPa | Max.<br>Load<br>% | Break<br>MPa | Elastic<br>modulus<br>MPa | Input<br>Grip<br>% | Grip<br>traversa<br>% | Comentary<br>° |
|----------|------------------------|-------------|---------------------|---------------------|-----------------------|-------------------|--------------|---------------------------|--------------------|-----------------------|----------------|
| 1        | EVA 28025 + W.F. (50%) | 4.1         | 0.32                | 3.1                 | 3.1                   | 3.2               | 0.9          | 219.0                     | 28.3               | 27.1                  | OK             |
| 2        | EVA 28025 + W.F. (50%) | 4.1         | 0.33                | 2.9                 | 2.9                   | 2.8               | 0.8          | 217.4                     | 20.0               | 20.1                  | OK             |
| 3        | EVA 28025 + W.F. (50%) | 4.1         | 0.32                | 2.9                 | 2.9                   | 3.2               | 0.9          | 228.0                     | 33.3               | 32.2                  | OK             |
| 4        | EVA 28025 + W.F. (50%) | 4.1         | 0.33                | 2.9                 | 2.9                   | 3.2               | 0.7          | 192.9                     | 30.0               | 28.2                  | OK             |
| ---      | ---                    | ---         | ---                 | ---                 | ---                   | ---               | ---          | ---                       | ---                | ---                   | ---            |
| ---      | ---                    | ---         | ---                 | ---                 | ---                   | ---               | ---          | ---                       | ---                | ---                   | ---            |
| Avera    | ---                    | 4.1         | 0.33                | 3.0                 | 3.0                   | 3.1               | 0.8          | 214.3                     | 27.9               | 26.9                  | ---            |
| SD(N)    | ---                    | 0.0         | 0.01                | 0.1                 | 0.1                   | 0.2               | 0.1          | 13.0                      | 4.9                | 4.4                   | ---            |
| CV%      | ---                    | 0.0         | 1.54                | 2.9                 | 2.9                   | 5.6               | 10.1         | 6.1                       | 17.6               | 16.2                  | ---            |

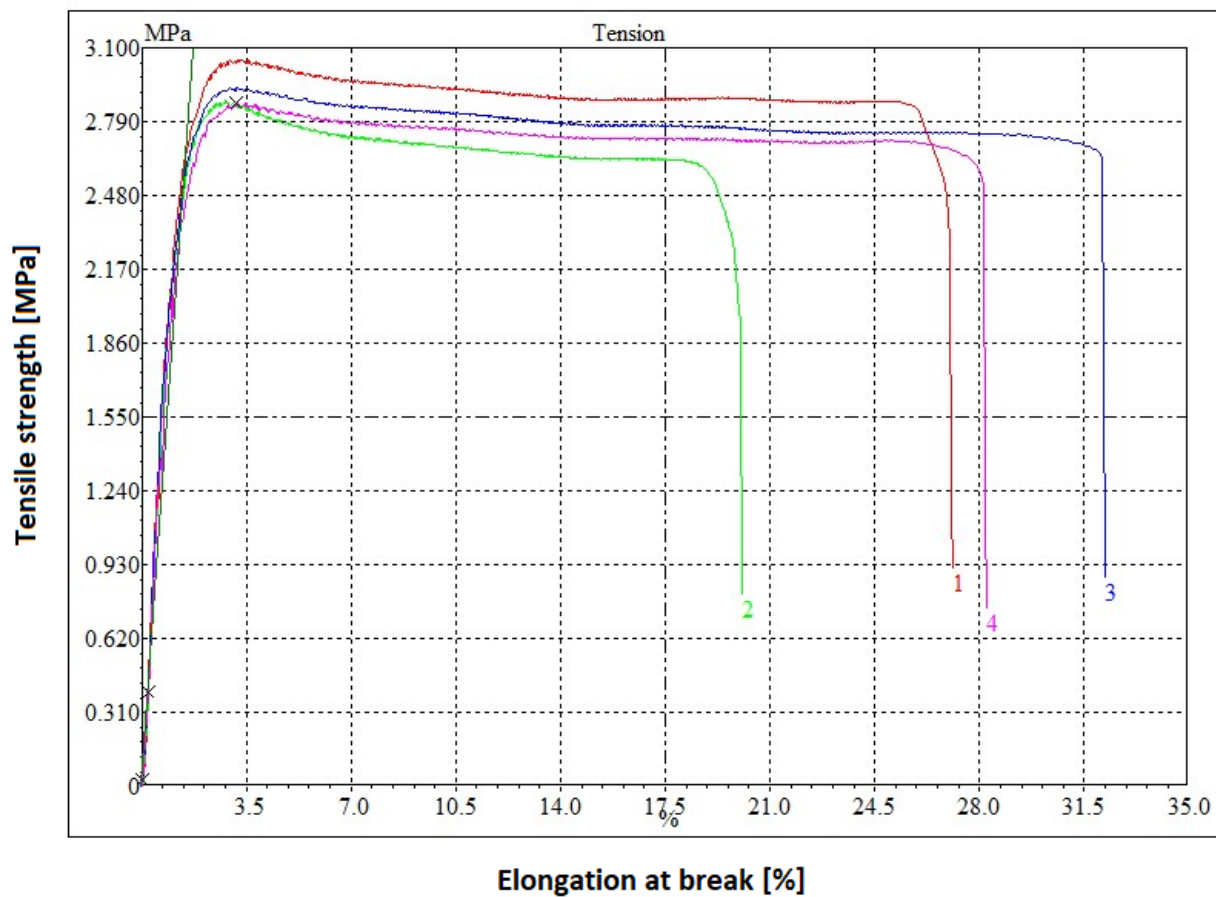

**EVA 28005 + W.F. (50%)**

Speed: 100.000 mm/min

Extrusion Grinev (Thickness: 1.0 mm) ; +21.8°C, 7.7%HR Test Data: 05-12-2017

Metod Extension#75

| Test No. | Material               | Width<br>mm | Thick<br>ness<br>mm | Max.<br>Load<br>MPa | Yield<br>point<br>MPa | Max.<br>Load<br>% | Break<br>MPa | Elastic<br>modulus<br>MPa | Input<br>Grip<br>% | Grip<br>traversa<br>% | Comentary<br>° |
|----------|------------------------|-------------|---------------------|---------------------|-----------------------|-------------------|--------------|---------------------------|--------------------|-----------------------|----------------|
| 1        | EVA 28005 + W.F. (50%) | 4.1         | 0.31                | 3.2                 | 3.1                   | 33.2              | 0.8          | 198.5                     | 60.0               | 57.5                  | OK             |
| 2        | EVA 28005 + W.F. (50%) | 4.1         | 0.31                | 3.4                 | 3.4                   | 4.1               | 0.9          | 247.6                     | 55.0               | 54.8                  | OK             |
| 3        | EVA 28005 + W.F. (50%) | 4.1         | 0.27                | 3.4                 | 3.4                   | 3.6               | 1.0          | 260.5                     | 50.0               | 50.1                  | NO             |
| 4        | EVA 28005 + W.F. (50%) | 4.1         | 0.33                | 3.6                 | 3.6                   | 4.3               | 1.0          | 246.0                     | 53.3               | 52.4                  | OK             |
| ---      | ---                    | ---         | ---                 | ---                 | ---                   | ---               | ---          | ---                       | ---                | ---                   | ---            |
| ---      | ---                    | ---         | ---                 | ---                 | ---                   | ---               | ---          | ---                       | ---                | ---                   | ---            |
| Avera    | ---                    | 4.1         | 0.30                | 3.4                 | 3.4                   | 11.3              | 0.9          | 238.2                     | 54.6               | 53.7                  | ---            |
| SD(N)    | ---                    | 0.0         | 0.02                | 0.1                 | 0.2                   | 12.6              | 0.1          | 23.6                      | 3.6                | 2.8                   | ---            |
| CV%      | ---                    | 0.0         | 7.15                | 4.2                 | 5.3                   | 111.9             | 9.0          | 9.9                       | 6.6                | 5.1                   | ---            |

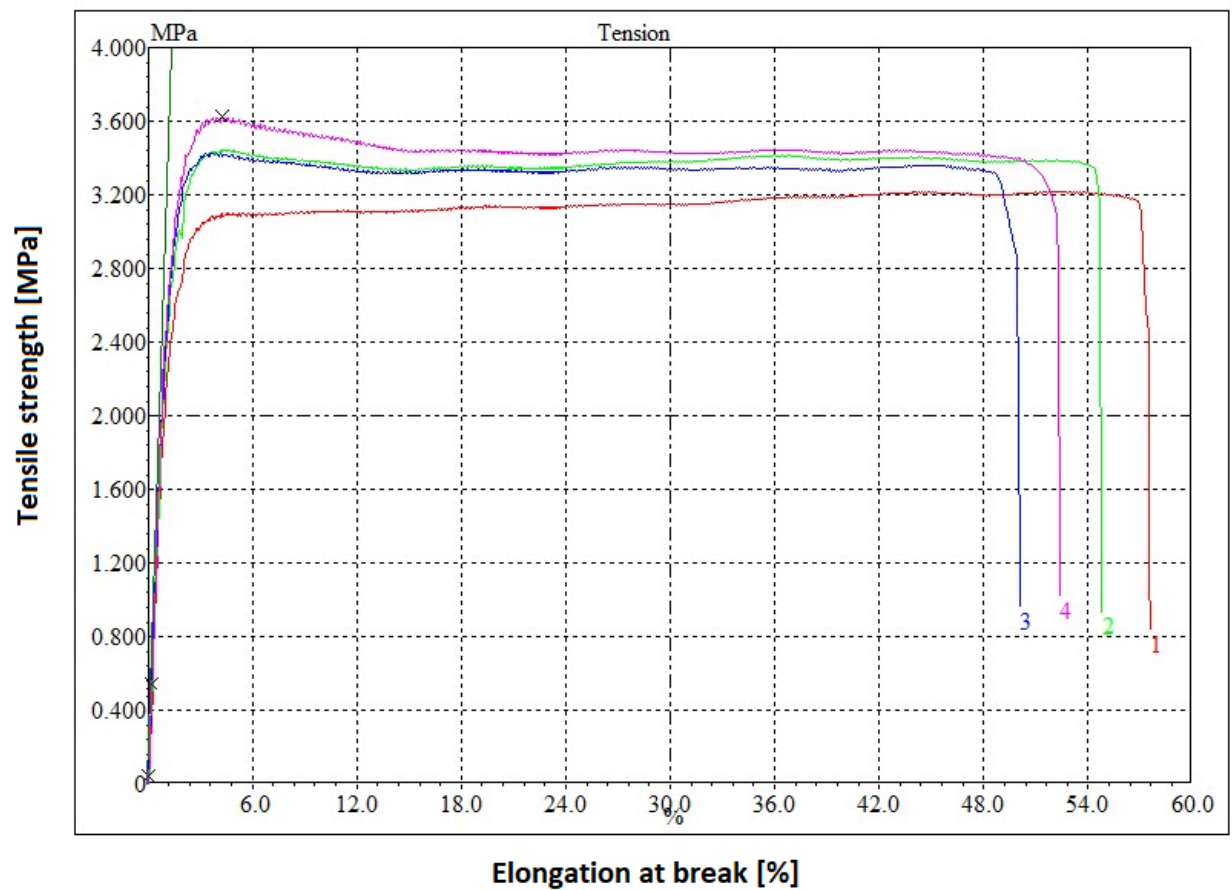

**EVA 19150 + W.F. (50%)**

Speed: 100.000 mm/min

Extrusion Grinev (Thickness: 1.0 mm) ; +21.8°C, 7.7%HR Test Data: 06-12-2017

Metod Extension#75

| Test No. | Material               | Width<br>mm | Thick<br>ness<br>mm | Max.<br>Load<br>MPa | Yield<br>point<br>MPa | Max.<br>Load<br>% | Break<br>MPa | Elastic<br>modulus<br>MPa | Input<br>Grip<br>% | Grip<br>traversa<br>% | Comentary<br>° |
|----------|------------------------|-------------|---------------------|---------------------|-----------------------|-------------------|--------------|---------------------------|--------------------|-----------------------|----------------|
| 1        | EVA 19150 + W.F. (50%) | 4.1         | 0.29                | 3.0                 | 3.0                   | 2.2               | 0.8          | 292.9                     | 5.0                | 4.1                   | OK             |
| 2        | EVA 19150 + W.F. (50%) | 4.1         | 0.29                | 3.1                 | 3.1                   | 2.3               | 0.8          | 336.6                     | 3.3                | 3.7                   | NO             |
| 3        | EVA 19150 + W.F. (50%) | 4.1         | 0.30                | 3.3                 | 3.3                   | 2.4               | 0.9          | 275.2                     | 5.0                | 3.9                   | OK             |
| 4        | EVA 19150 + W.F. (50%) | 4.1         | 0.30                | 3.0                 | 3.0                   | 2.3               | 0.7          | 316.8                     | 5.0                | 4.1                   | NO             |
| ---      | ---                    | ---         | ---                 | ---                 | ---                   | ---               | ---          | ---                       | ---                | ---                   | ---            |
| ---      | ---                    | ---         | ---                 | ---                 | ---                   | ---               | ---          | ---                       | ---                | ---                   | ---            |
| Avera    | ---                    | 4.1         | 0.29                | 3.1                 | 3.1                   | 2.3               | 0.8          | 305.4                     | 4.6                | 3.9                   | ---            |
| SD(N)    | ---                    | 0.0         | 0.00                | 0.1                 | 0.1                   | 0.1               | 0.1          | 23.3                      | 0.7                | 0.2                   | ---            |
| CV%      | ---                    | 0.0         | 1.69                | 4.0                 | 4.0                   | 3.1               | 8.8          | 7.6                       | 16.1               | 4.2                   | ---            |

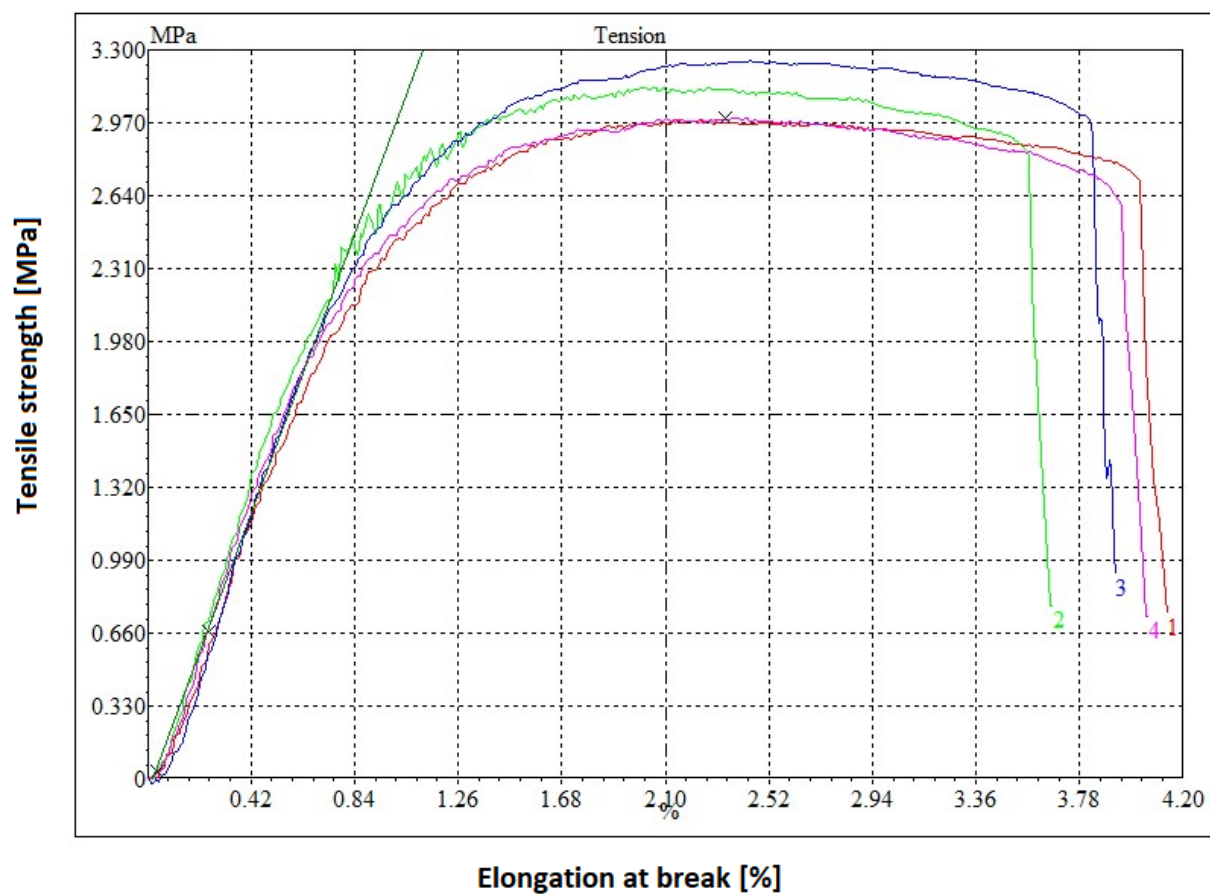

**EVA 15006 + W.F. (50%)**

Speed: 100.000 mm/min

Extrusion Grinev (Thickness: 1.0 mm) ; +21.8°C, 7.7%HR Test Data: 06-12-2017

Metod Extension#75

| Test No. | Material               | Width<br>mm | Thick<br>ness<br>mm | Max.<br>Load<br>MPa | Yield<br>point<br>MPa | Max.<br>Load<br>% | Break<br>MPa | Elastic<br>modulus<br>MPa | Input<br>Grip<br>% | Grip<br>traversa<br>% | Comentary<br>° |
|----------|------------------------|-------------|---------------------|---------------------|-----------------------|-------------------|--------------|---------------------------|--------------------|-----------------------|----------------|
| 1        | EVA 15006 + W.F. (50%) | 4.1         | 0.28                | 4.1                 | 4.1                   | 2.1               | 1.1          | 464.3                     | 6.7                | 4.8                   | OK             |
| 2        | EVA 15006 + W.F. (50%) | 4.1         | 0.29                | 3.7                 | 3.7                   | 2.3               | 1.1          | 267.9                     | 5.0                | 4.0                   | NO             |
| 3        | EVA 15006 + W.F. (50%) | 4.1         | 0.28                | 4.2                 | 4.2                   | 2.1               | 0.9          | 437.4                     | 5.0                | 5.6                   | NO             |
| 4        | EVA 15006 + W.F. (50%) | 4.1         | 0.28                | 4.5                 | 4.5                   | 2.2               | 1.3          | 434.2                     | 3.3                | 4.5                   | NO             |
| ---      | ---                    | ---         | ---                 | ---                 | ---                   | ---               | ---          | ---                       | ---                | ---                   | ---            |
| ---      | ---                    | ---         | ---                 | ---                 | ---                   | ---               | ---          | ---                       | ---                | ---                   | ---            |
| Avera    | ---                    | 4.1         | 0.28                | 4.1                 | 4.1                   | 2.2               | 1.1          | 400.9                     | 5.0                | 4.7                   | ---            |
| SD(N)    | ---                    | 0.0         | 0.00                | 0.3                 | 0.3                   | 0.1               | 0.1          | 77.7                      | 1.2                | 0.6                   | ---            |
| CV%      | ---                    | 0.0         | 1.53                | 6.9                 | 6.9                   | 3.8               | 12.9         | 19.4                      | 24.0               | 12.3                  | ---            |

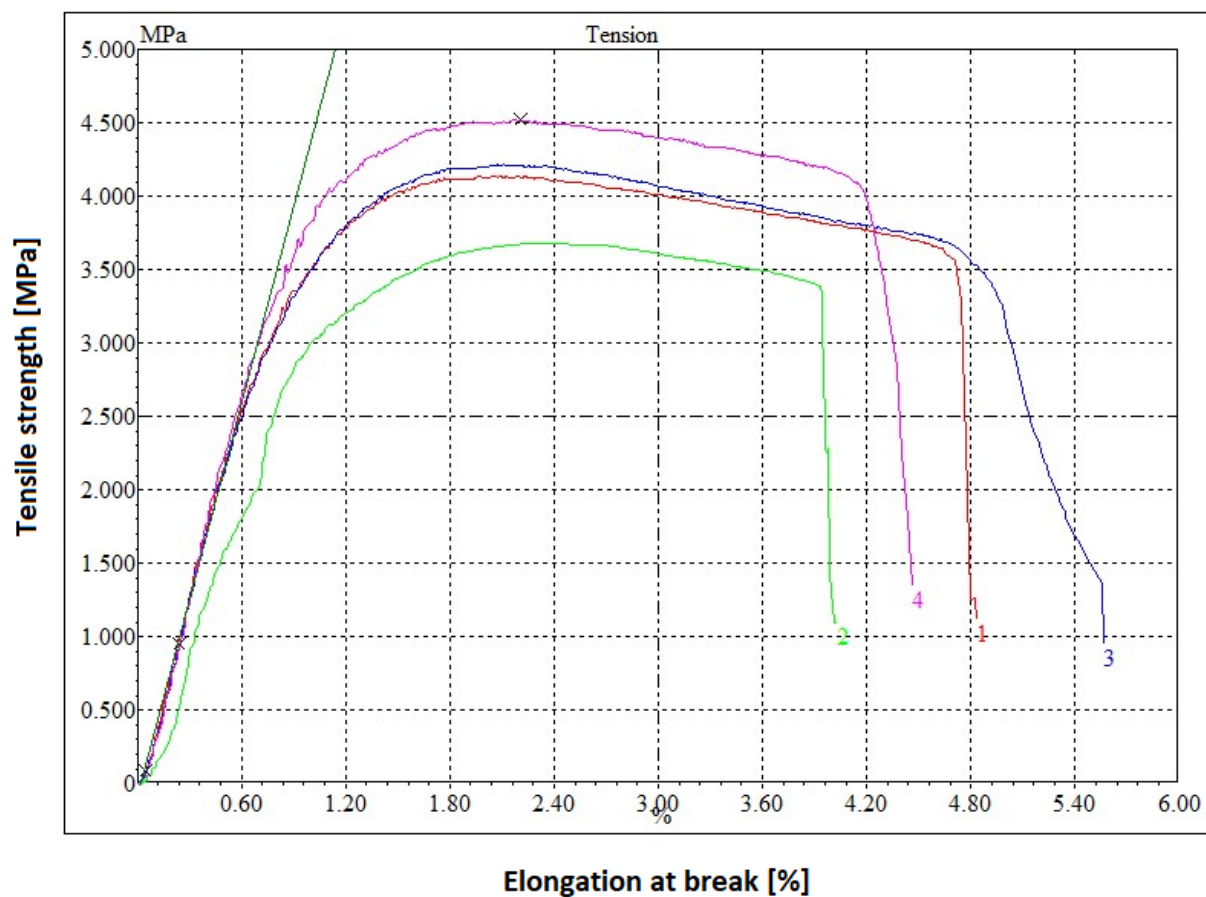



**EVA 28150 + W.F. (60%)**

Speed: 100.000 mm/min

Extrusion Grinev (Thickness: 1.0 mm) ; +21.8°C, 7.7%HR Test Data: 13-12-2017

Metod

| Test No. | Material               | Width<br>mm | Thick<br>ness<br>mm | Max.<br>Load<br>MPa | Yield<br>point<br>MPa | Max.<br>Load<br>% | Break<br>MPa | Elastic<br>modulus<br>MPa | Input<br>Grip<br>% | Grip<br>traversa<br>% | Comentary<br>o |
|----------|------------------------|-------------|---------------------|---------------------|-----------------------|-------------------|--------------|---------------------------|--------------------|-----------------------|----------------|
| 1        | EVA 28150 + W.F. (60%) | 4.1         | 0.48                | 2.9                 | 2.9                   | 1.9               | 0.9          | 316.5                     | 5.0                | 3.9                   | NO             |
| 2        | EVA 28150 + W.F. (60%) | 4.1         | 0.45                | 2.4                 | 2.4                   | 1.8               | 0.7          | 277.1                     | 5.0                | 3.9                   | OK             |
| 3        | EVA 28150 + W.F. (60%) | 4.1         | 0.46                | 2.9                 | 2.9                   | 1.9               | 0.8          | 341.5                     | 5.0                | 4.8                   | OK             |
| 4        | EVA 28150 + W.F. (60%) | 4.1         | 0.47                | 2.6                 | 2.6                   | 2.4               | 0.7          | 235.3                     | 3.3                | 3.8                   | NO             |
| 5        | EVA 28150 + W.F. (60%) | 4.1         | 0.49                | 2.9                 | 2.9                   | 1.7               | 0.8          | 252.1                     | 3.3                | 3.6                   | NO             |
| ---      | ---                    | ---         | ---                 | ---                 | ---                   | ---               | ---          | ---                       | ---                | ---                   | ---            |
| Avera    | ---                    | 4.1         | 0.47                | 2.7                 | 2.7                   | 1.9               | 0.8          | 284.5                     | 4.3                | 4.0                   | ---            |
| SD(N)    | ---                    | 0.0         | 0.01                | 0.2                 | 0.2                   | 0.2               | 0.1          | 39.5                      | 0.8                | 0.4                   | ---            |
| CV%      | ---                    | 0.0         | 3.01                | 7.5                 | 7.5                   | 12.5              | 9.6          | 13.9                      | 19.3               | 10.4                  | ---            |

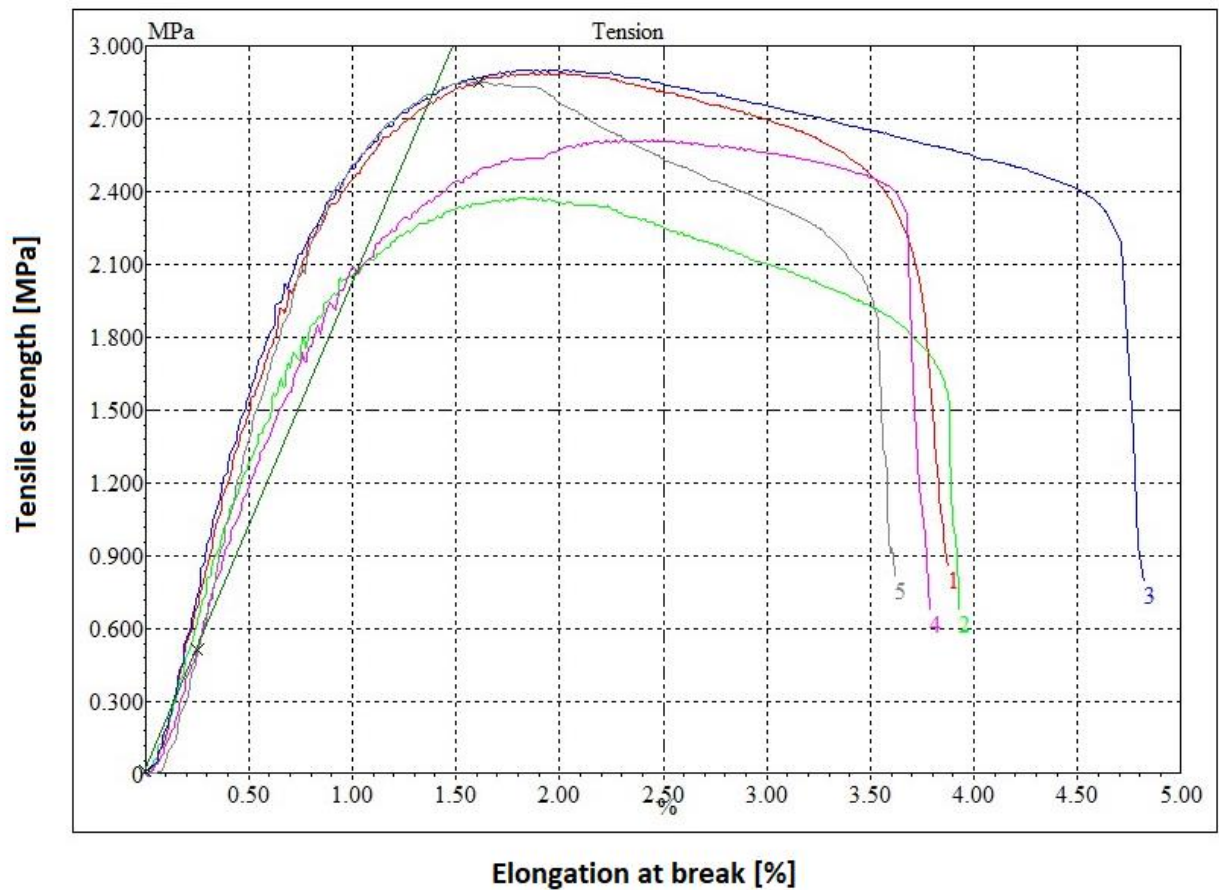

**EVA 28025 + W.F. (60%)**

Speed: 100.000 mm/min

Extrusion Grinev (Thickness: 1.0 mm) ; +21.8°C, 7.7%HR Test Data: 13-12-2017

Metod

| Test No. | Material               | Width<br>mm | Thick<br>ness<br>mm | Max.<br>Load<br>MPa | Yield<br>point<br>MPa | Max.<br>Load<br>% | Break<br>MPa | Elastic<br>modulus<br>MPa | Input<br>Grip<br>% | Grip<br>traversa<br>% | Comentary<br>° |
|----------|------------------------|-------------|---------------------|---------------------|-----------------------|-------------------|--------------|---------------------------|--------------------|-----------------------|----------------|
| 1        | EVA 28025 + W.F. (60%) | 4.1         | 0.38                | 2.8                 | 2.8                   | 2.4               | 0.8          | 342.9                     | 8.3                | 7.9                   | OK             |
| 2        | EVA 28025 + W.F. (60%) | 4.1         | 0.41                | 2.6                 | 2.6                   | 2.1               | 0.8          | 308.2                     | 8.3                | 9.1                   | OK             |
| 3        | EVA 28025 + W.F. (60%) | 4.1         | 0.40                | 3.0                 | 3.0                   | 2.5               | 0.9          | 382.4                     | 8.3                | 9.1                   | OK             |
| ---      | ---                    | ---         | ---                 | ---                 | ---                   | ---               | ---          | ---                       | ---                | ---                   | ---            |
| ---      | ---                    | ---         | ---                 | ---                 | ---                   | ---               | ---          | ---                       | ---                | ---                   | ---            |
| ---      | ---                    | ---         | ---                 | ---                 | ---                   | ---               | ---          | ---                       | ---                | ---                   | ---            |
| Avera    | ---                    | 4.1         | 0.40                | 2.8                 | 2.8                   | 2.3               | 0.8          | 344.5                     | 8.3                | 8.7                   | ---            |
| SD(N)    | ---                    | 0.0         | 0.01                | 0.2                 | 0.2                   | 0.2               | 0.0          | 30.3                      | 0.0                | 0.6                   | ---            |
| CV%      | ---                    | 0.0         | 3.14                | 5.8                 | 5.8                   | 7.3               | 5.7          | 8.8                       | 0.0                | 6.5                   | ---            |

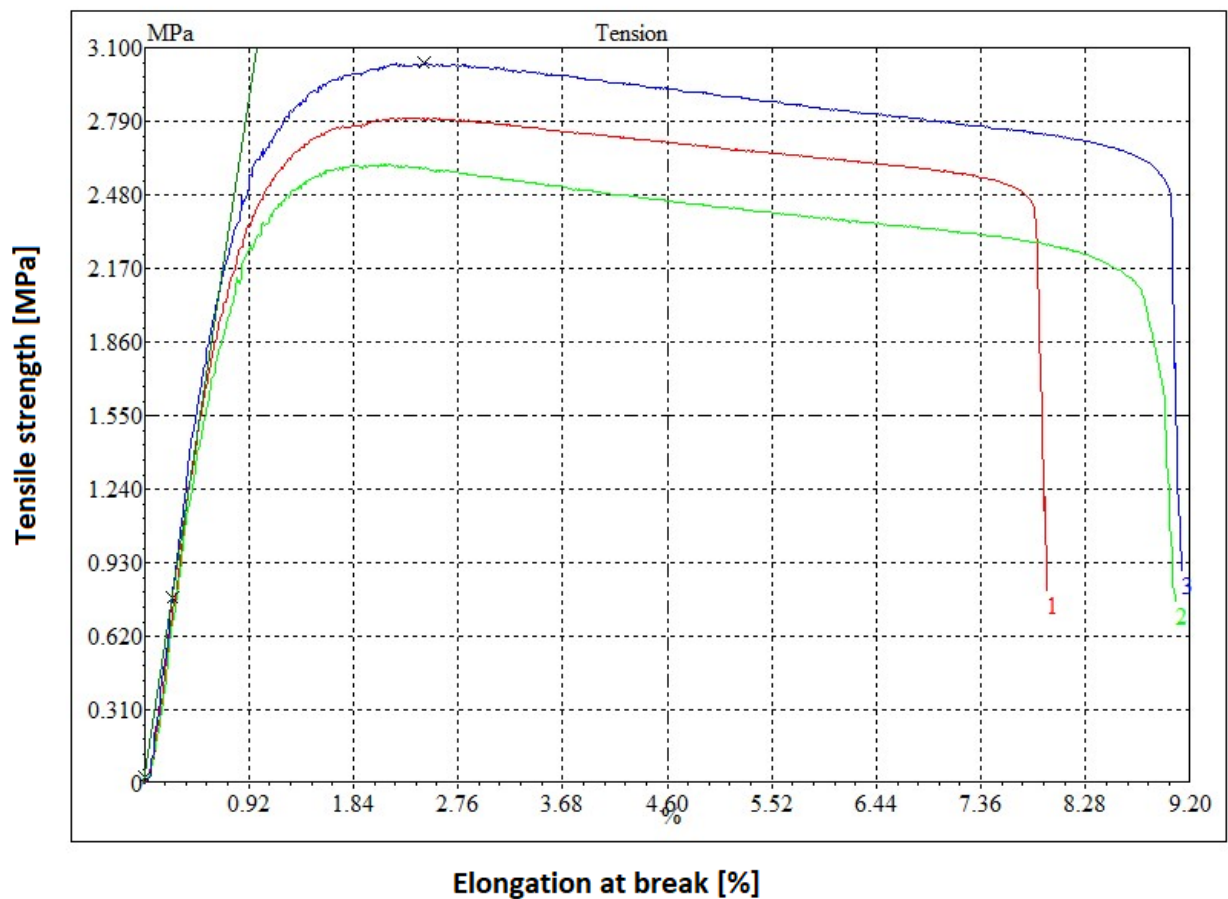

**EVA 28005 + W.F. (60%)**

Speed: 100.000 mm/min

Extrusion Grinev (Thickness: 1.0 mm) ; +21.8°C, 7.7%HR Test Data: 13-12-2017

Metod

| Test No. | Material               | Width<br>mm | Thick<br>ness<br>mm | Max.<br>Load<br>MPa | Yeild<br>point<br>MPa | Max.<br>Load<br>% | Break<br>MPa | Elastic<br>modulus<br>MPa | Input<br>Grip<br>% | Grip<br>traversa<br>% | Comentary<br>° |
|----------|------------------------|-------------|---------------------|---------------------|-----------------------|-------------------|--------------|---------------------------|--------------------|-----------------------|----------------|
| 1        | EVA 28005 + W.F. (60%) | 4.1         | 0.41                | 3.5                 | 3.5                   | 1.7               | 1.0          | 371.5                     | 5.0                | 7.3                   | NO             |
| 2        | EVA 28005 + W.F. (60%) | 4.1         | 0.38                | 3.4                 | 3.4                   | 1.9               | 1.0          | 363.2                     | 8.3                | 8.6                   | OK             |
| 3        | EVA 28005 + W.F. (60%) | 4.1         | 0.40                | 3.4                 | 3.4                   | 1.8               | 0.9          | 246.1                     | 8.3                | 9.0                   | OK             |
| ---      | ---                    | ---         | ---                 | ---                 | ---                   | ---               | ---          | ---                       | ---                | ---                   | ---            |
| ---      | ---                    | ---         | ---                 | ---                 | ---                   | ---               | ---          | ---                       | ---                | ---                   | ---            |
| ---      | ---                    | ---         | ---                 | ---                 | ---                   | ---               | ---          | ---                       | ---                | ---                   | ---            |
| Avera    | ---                    | 4.1         | 0.40                | 3.4                 | 3.4                   | 1.8               | 1.0          | 326.9                     | 7.2                | 8.3                   | ---            |
| SD(N)    | ---                    | 0.0         | 0.01                | 0.0                 | 0.0                   | 0.1               | 0.0          | 57.3                      | 1.6                | 0.7                   | ---            |
| CV%      | ---                    | 0.0         | 3.14                | 1.4                 | 1.4                   | 4.5               | 4.9          | 17.5                      | 21.6               | 8.7                   | ---            |

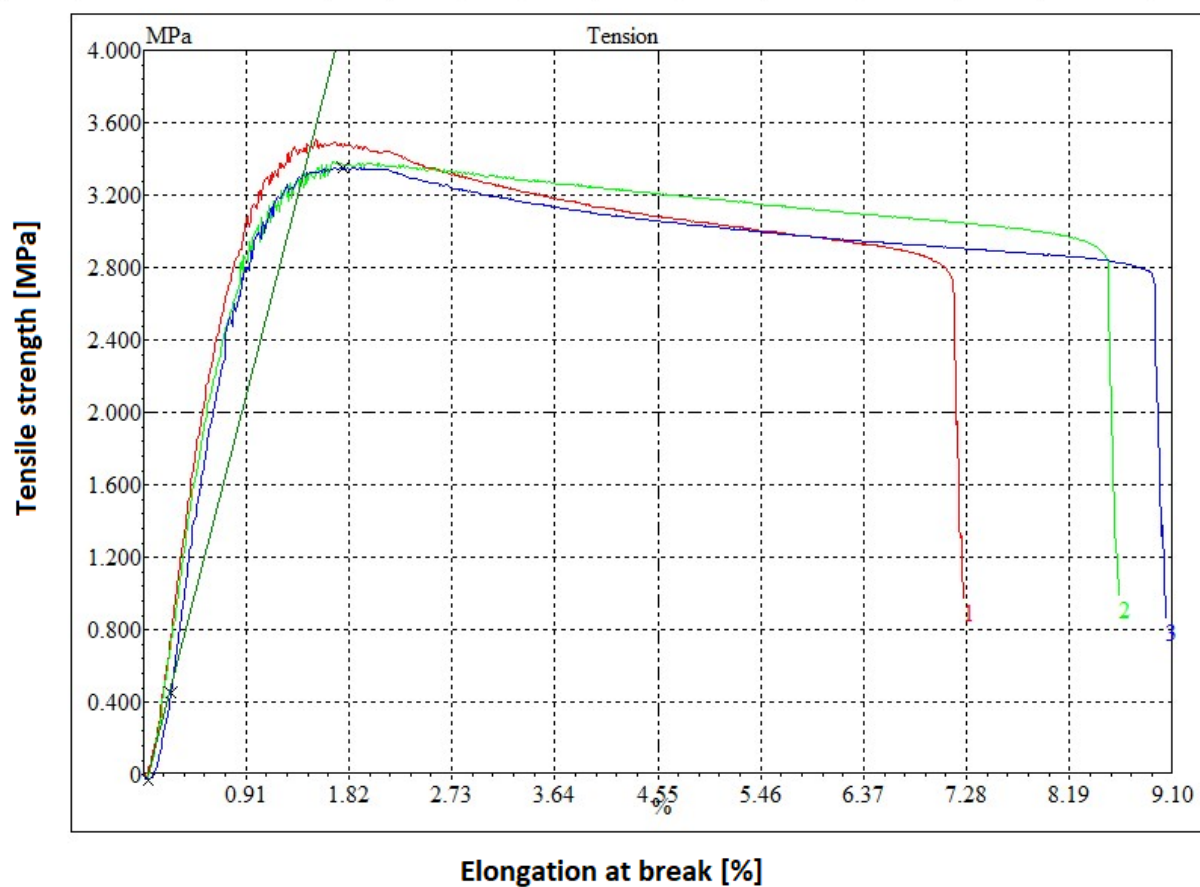

**EVA 19150 + W.F. (60%)**

Speed: 100.000 mm/min

Extrusion Grinev (Thickness: 1.0 mm) ; +21.8°C, 7.7%HR Test Data: 13-12-2017

Metod

| Test No. | Material               | Width | Thick ness | Max. Load | Yeild point | Max. Load | Break | Elastic modulus | Input Grip | Grip traversa | Comentary |
|----------|------------------------|-------|------------|-----------|-------------|-----------|-------|-----------------|------------|---------------|-----------|
|          |                        | mm    | mm         | MPa       | MPa         | %         | MPa   | MPa             | %          | %             | o         |
| 1        | EVA 19150 + W.F. (60%) | 4.1   | 0.41       | 2.6       | 2.6         | 1.8       | 0.7   | 307.7           | 1.7        | 2.5           | OK        |
| 2        | EVA 19150 + W.F. (60%) | 4.1   | 0.42       | 3.0       | 3.0         | 2.0       | 0.8   | 395.7           | 1.7        | 2.7           | OK        |
| 3        | EVA 19150 + W.F. (60%) | 4.1   | 0.41       | 2.8       | 2.8         | -         | 0.7   | 392.1           | 1.7        | 1.6           | OK        |
| 4        | EVA 19150 + W.F. (60%) | 4.1   | 0.44       | 3.0       | 3.0         | 2.1       | 0.9   | 336.9           | 1.7        | 2.7           | NO        |
| 5        | EVA 19150 + W.F. (60%) | 4.1   | 0.38       | 2.7       | 2.7         | -         | 0.8   | 272.7           | 1.7        | 1.7           | NO        |
| ---      | ---                    | ---   | ---        | ---       | ---         | ---       | ---   | ---             | ---        | ---           | ---       |
| Avera    | ---                    | 4.1   | 0.41       | 2.8       | 2.8         | 2.0       | 0.8   | 341.0           | 1.7        | 2.2           | ---       |
| SD(N)    | ---                    | 0.0   | 0.02       | 0.2       | 0.2         | 0.1       | 0.1   | 47.7            | 0.0        | 0.5           | ---       |
| CV%      | ---                    | 0.0   | 4.71       | 5.7       | 5.7         | 6.3       | 9.6   | 14.0            | 0.0        | 21.8          | ---       |

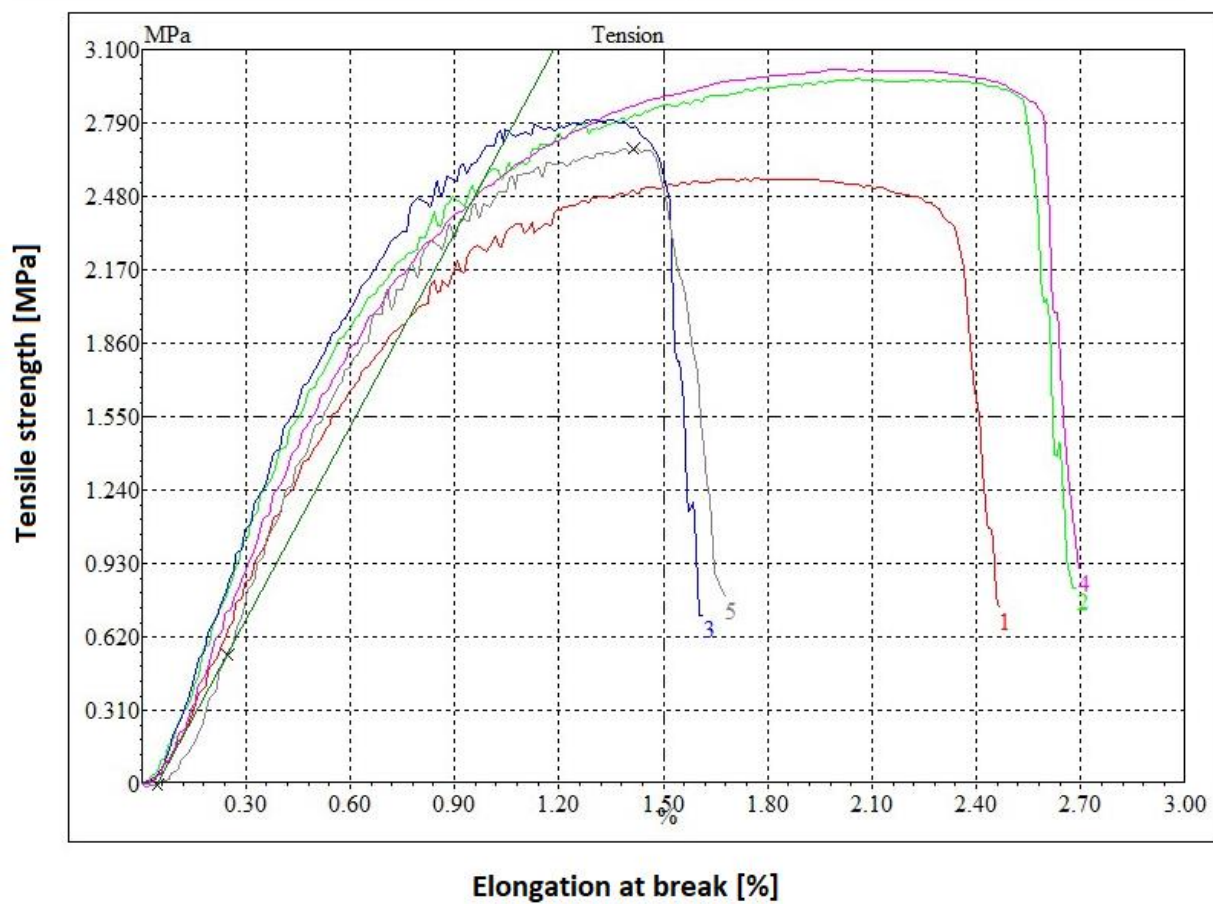



**EVA 15006 + W.F. (60%)**

Speed: 100.000 mm/min

Extrusion Grinev (Thickness: 1.0 mm) ; +21.8°C, 7.7%HR Test Data: 13-12-2017

Metod

| Test No. | Material               | Width<br>mm | Thick<br>ness<br>mm | Max.<br>Load<br>MPa | Yield<br>point<br>MPa | Max.<br>Load<br>% | Break<br>MPa | Elastic<br>modulus<br>MPa | Input<br>Grip<br>% | Grip<br>traversa<br>% | Comentary<br>o |
|----------|------------------------|-------------|---------------------|---------------------|-----------------------|-------------------|--------------|---------------------------|--------------------|-----------------------|----------------|
| 1        | EVA 15006 + W.F. (60%) | 4.1         | 0.49                | 3.9                 | 3.9                   | 2.1               | 1.1          | 391.1                     | 3.3                | 3.5                   | NO             |
| 2        | EVA 15006 + W.F. (60%) | 4.1         | 0.46                | 5.0                 | 5.0                   | 1.7               | 1.5          | 530.5                     | 1.7                | 2.2                   | NO             |
| 3        | EVA 15006 + W.F. (60%) | 4.1         | 0.45                | 5.2                 | 5.2                   | 1.7               | 1.5          | 529.9                     | 1.7                | 2.1                   | OK             |
| ---      | ---                    | ---         | ---                 | ---                 | ---                   | ---               | ---          | ---                       | ---                | ---                   | ---            |
| ---      | ---                    | ---         | ---                 | ---                 | ---                   | ---               | ---          | ---                       | ---                | ---                   | ---            |
| ---      | ---                    | ---         | ---                 | ---                 | ---                   | ---               | ---          | ---                       | ---                | ---                   | ---            |
| Avera    | ---                    | 4.1         | 0.47                | 4.7                 | 4.7                   | 1.8               | 1.4          | 483.8                     | 2.2                | 2.6                   | ---            |
| SD(N)    | ---                    | 0.0         | 0.02                | 0.6                 | 0.6                   | 0.2               | 0.2          | 65.6                      | 0.8                | 0.6                   | ---            |
| CV%      | ---                    | 0.0         | 3.64                | 12.2                | 12.2                  | 10.3              | 13.8         | 13.6                      | 33.8               | 24.5                  | ---            |

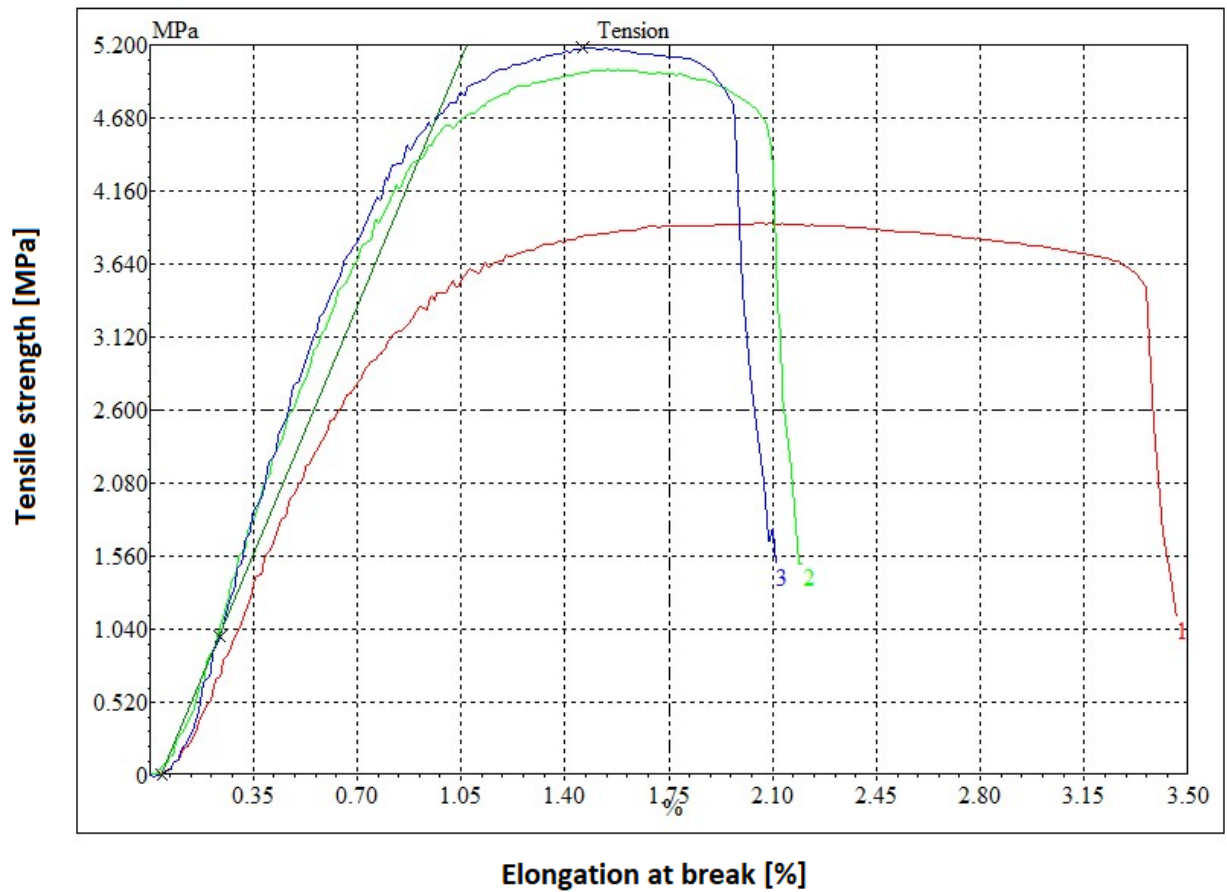

**EVA 28150 + W.F (70%)**

Speed: 100.000 mm/min

Extrusion Grinev (Thickness: 1.0 mm) ; +21.8°C, 7.7%HR Test Data: 14-12-2017

Metod

| Test No. | Material              | Width | Thick ness | Max. Load | Yeild point | Max. Load | Break | Elastic modulus | Input Grip | Grip traversa | Comentary |
|----------|-----------------------|-------|------------|-----------|-------------|-----------|-------|-----------------|------------|---------------|-----------|
|          |                       | mm    | mm         | MPa       | MPa         | %         | MPa   | MPa             | %          | %             | o         |
| 1        | EVA 28150 + W.F (70%) | 4.1   | 0.59       | 2.1       | 2.1         | 3.1       | 0.6   | 201.2           | 5.0        | 4.5           | OK        |
| 2        | EVA 28150 + W.F (70%) | 4.1   | 0.60       | 2.0       | 2.0         | 2.8       | 0.4   | 212.6           | 5.0        | 4.0           | OK        |
| 3        | EVA 28150 + W.F (70%) | 4.1   | 0.57       | 2.4       | 2.4         | 3.1       | 0.7   | 229.4           | 5.0        | 4.2           | NO        |
| ---      | ---                   | ---   | ---        | ---       | ---         | ---       | ---   | ---             | ---        | ---           | ---       |
| ---      | ---                   | ---   | ---        | ---       | ---         | ---       | ---   | ---             | ---        | ---           | ---       |
| ---      | ---                   | ---   | ---        | ---       | ---         | ---       | ---   | ---             | ---        | ---           | ---       |
| Avera    | ---                   | 4.1   | 0.59       | 2.2       | 2.2         | 3.0       | 0.6   | 214.4           | 5.0        | 4.2           | ---       |
| SD(N)    | ---                   | 0.0   | 0.01       | 0.2       | 0.2         | 0.1       | 0.1   | 11.6            | 0.0        | 0.2           | ---       |
| CV%      | ---                   | 0.0   | 2.13       | 7.8       | 7.8         | 4.7       | 22.0  | 5.4             | 0.0        | 4.9           | ---       |

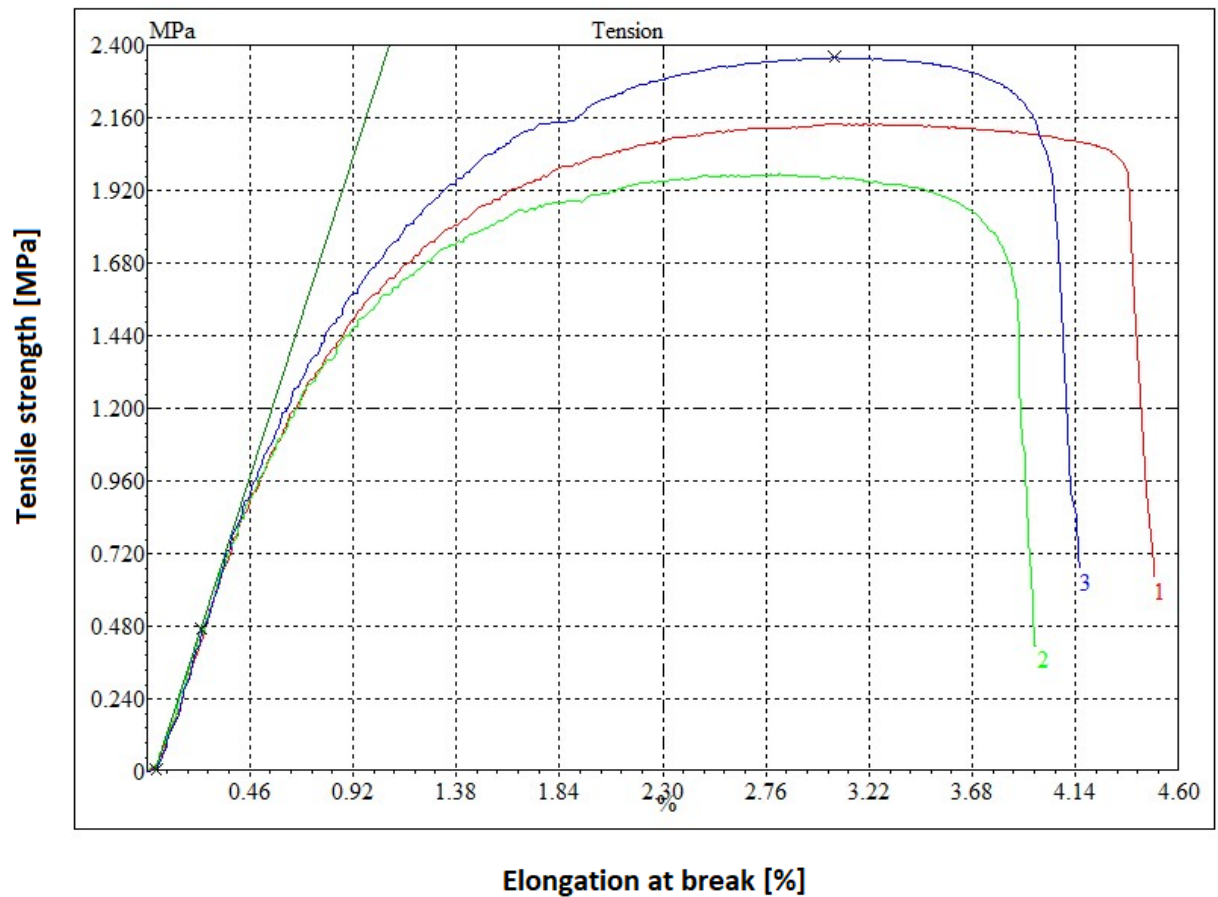

**EVA 28025 + W.F (70%)**

Speed: 100.000 mm/min

Extrusion Grinev (Thickness: 1.0 mm) ; +21.8°C, 7.7%HR Test Data: 14-12-2017

Metod

| Test No. | Material              | Width<br>mm | Thick<br>ness<br>mm | Max.<br>Load<br>MPa | Yield<br>point<br>MPa | Max.<br>Load<br>% | Break<br>MPa | Elastic<br>modulus<br>MPa | Input<br>Grip<br>% | Grip<br>traversa<br>% | Comentary<br>° |
|----------|-----------------------|-------------|---------------------|---------------------|-----------------------|-------------------|--------------|---------------------------|--------------------|-----------------------|----------------|
| 1        | EVA 28025 + W.F (70%) | 4.1         | 0.48                | 2.6                 | 2.6                   | 3.1               | 0.8          | 229.0                     | 6.7                | 6.2                   | OK             |
| 2        | EVA 28025 + W.F (70%) | 4.1         | 0.50                | 2.5                 | 2.5                   | 3.8               | 0.7          | 191.1                     | 11.7               | 10.7                  | OK             |
| 3        | EVA 28025 + W.F (70%) | 4.1         | 0.49                | 2.4                 | 2.4                   | 3.7               | 0.6          | 173.7                     | 10.0               | 8.9                   | OK             |
| 4        | EVA 28025 + W.F (70%) | 4.1         | 0.50                | 2.5                 | 2.5                   | 3.1               | 0.7          | 177.9                     | 5.0                | 4.1                   | OK             |
| ---      | ---                   | ---         | ---                 | ---                 | ---                   | ---               | ---          | ---                       | ---                | ---                   | ---            |
| ---      | ---                   | ---         | ---                 | ---                 | ---                   | ---               | ---          | ---                       | ---                | ---                   | ---            |
| Avera    | ---                   | 4.1         | 0.49                | 2.5                 | 2.5                   | 3.4               | 0.7          | 192.9                     | 8.3                | 7.5                   | ---            |
| SD(N)    | ---                   | 0.0         | 0.01                | 0.1                 | 0.1                   | 0.3               | 0.1          | 21.8                      | 2.6                | 2.5                   | ---            |
| CV%      | ---                   | 0.0         | 1.68                | 2.8                 | 2.8                   | 9.5               | 10.1         | 11.3                      | 31.6               | 33.7                  | ---            |

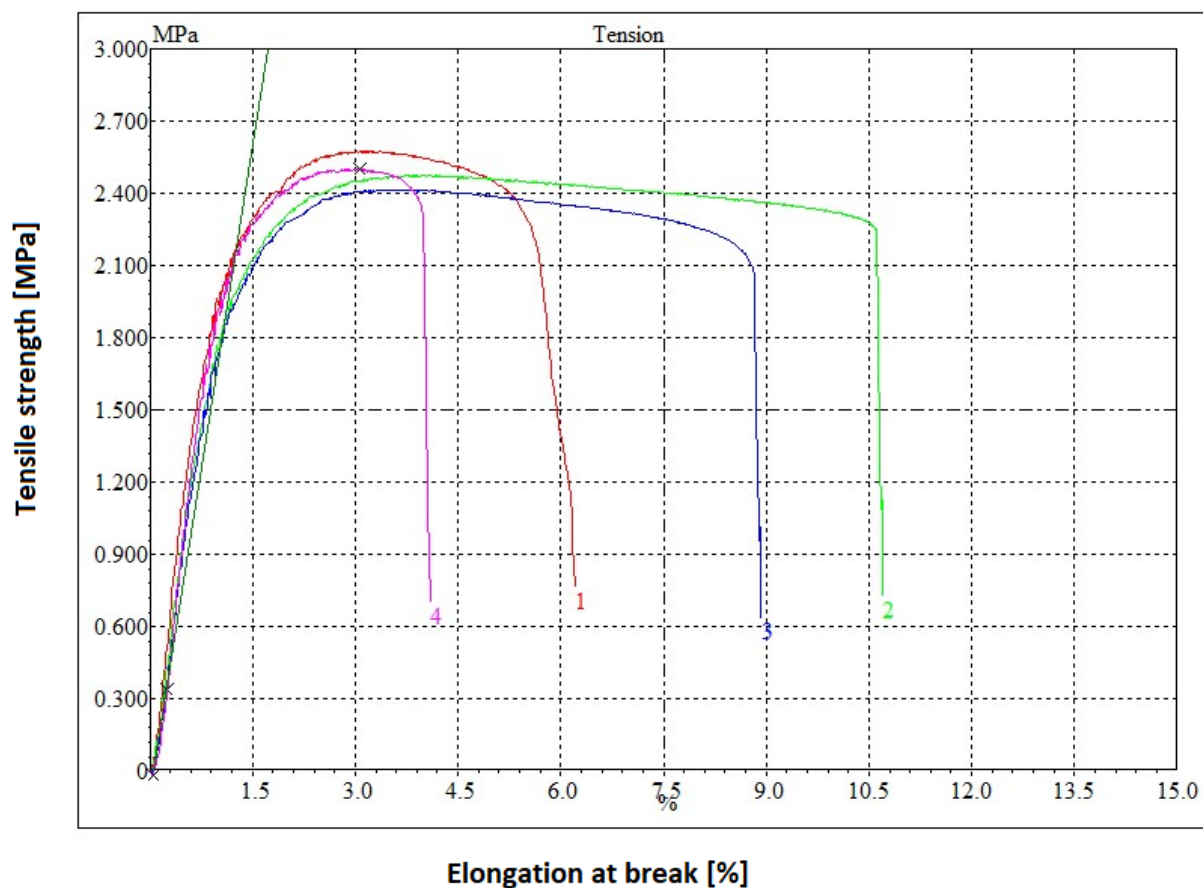

**EVA 28005 + W.F (70%)**

Speed: 100.000 mm/min

Extrusion Grinev (Thickness: 1.0 mm) ; +21.8°C, 7.7%HR Test Data: 14-12-2017

Metod

| Test No. | Material              | Width<br>mm | Thick<br>ness<br>mm | Max.<br>Load<br>MPa | Yield<br>point<br>MPa | Max.<br>Load<br>% | Break<br>MPa | Elastic<br>modulus<br>MPa | Input<br>Grip<br>% | Grip<br>traversa<br>% | Comentary<br>° |
|----------|-----------------------|-------------|---------------------|---------------------|-----------------------|-------------------|--------------|---------------------------|--------------------|-----------------------|----------------|
| 1        | EVA 28005 + W.F (70%) | 4.1         | 0.56                | 3.3                 | 3.3                   | 3.2               | 0.9          | 146.1                     | 5.0                | 4.3                   | OK             |
| 2        | EVA 28005 + W.F (70%) | 4.1         | 0.60                | 3.4                 | 3.4                   | 2.7               | 0.9          | 154.2                     | 5.0                | 3.4                   | OK             |
| 3        | EVA 28005 + W.F (70%) | 4.1         | 0.57                | 3.2                 | 3.2                   | 2.6               | 0.9          | 272.6                     | 3.3                | 3.5                   | NO             |
| ---      | ---                   | ---         | ---                 | ---                 | ---                   | ---               | ---          | ---                       | ---                | ---                   | ---            |
| ---      | ---                   | ---         | ---                 | ---                 | ---                   | ---               | ---          | ---                       | ---                | ---                   | ---            |
| ---      | ---                   | ---         | ---                 | ---                 | ---                   | ---               | ---          | ---                       | ---                | ---                   | ---            |
| Avera    | ---                   | 4.1         | 0.58                | 3.3                 | 3.3                   | 2.8               | 0.9          | 191.0                     | 4.4                | 3.7                   | ---            |
| SD(N)    | ---                   | 0.0         | 0.02                | 0.1                 | 0.1                   | 0.3               | 0.0          | 57.8                      | 0.8                | 0.4                   | ---            |
| CV%      | ---                   | 0.0         | 2.95                | 2.5                 | 2.5                   | 9.3               | 0.0          | 30.3                      | 18.1               | 10.8                  | ---            |

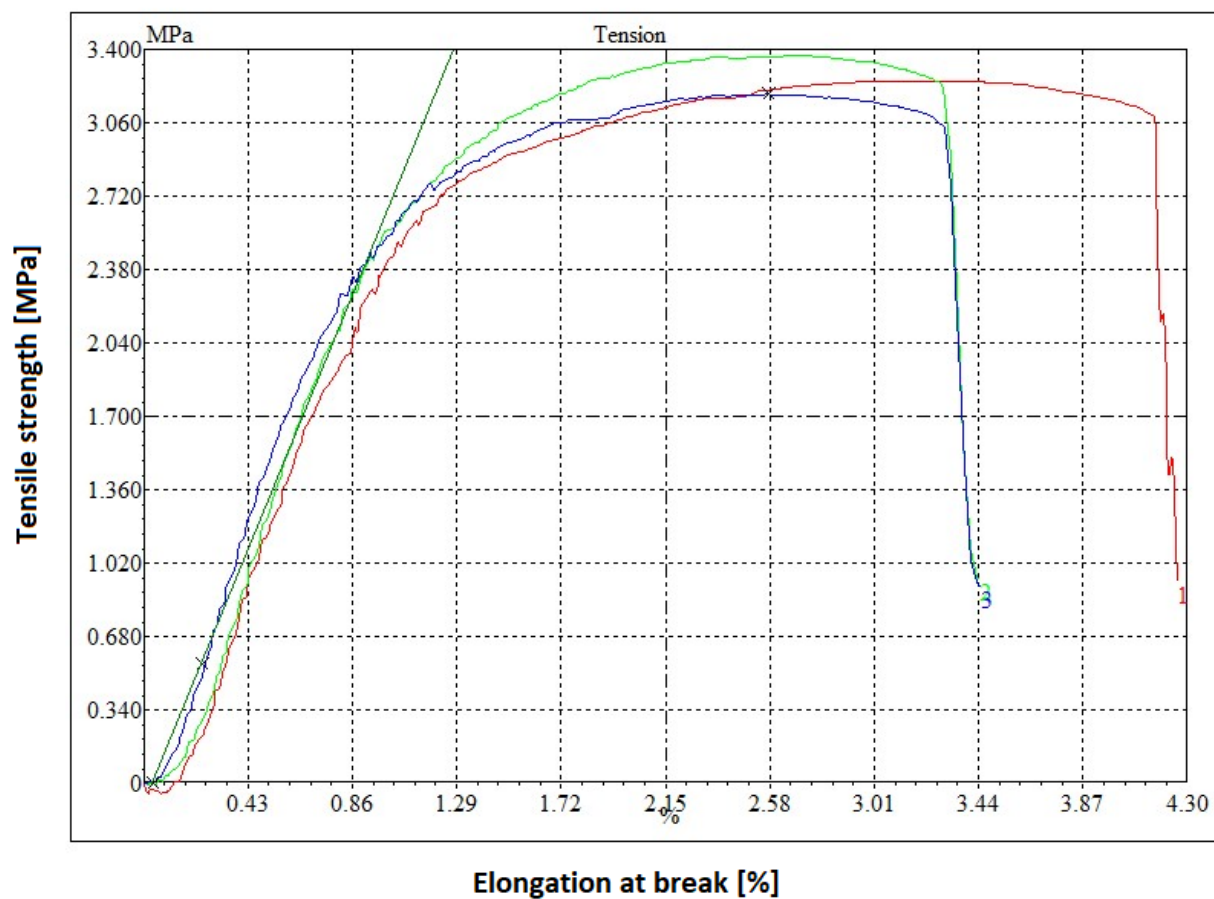



**EVA 19150+ W.F (70%)**

Speed: 100.000 mm/min

Extrusion Grinev (Thickness: 1.0 mm) ; +21.8°C, 7.7%HR Test Data: 14-12-2017

Metod

| Test No. | Material             | Width | Thick ness | Max. Load | Yeild point | Max. Load | Break | Elastic modulus | Input Grip | Grip traversa | Comentary |
|----------|----------------------|-------|------------|-----------|-------------|-----------|-------|-----------------|------------|---------------|-----------|
|          |                      | mm    | mm         | MPa       | MPa         | %         | MPa   | MPa             | %          | %             | °         |
| 1        | EVA 19150+ W.F (70%) | 4.1   | 0.52       | 2.3       | 2.3         | -         | 0.6   | 352.3           | 1.7        | 1.4           | OK        |
| 2        | EVA 19150+ W.F (70%) | 4.1   | 0.58       | 1.9       | 1.9         | -         | 0.6   | 312.0           | 1.7        | 1.1           | OK        |
| 3        | EVA 19150+ W.F (70%) | 4.1   | 0.53       | 2.1       | 2.1         | -         | 0.5   | 343.2           | 1.7        | 1.5           | OK        |
| ---      | ---                  | ---   | ---        | ---       | ---         | ---       | ---   | ---             | ---        | ---           | ---       |
| ---      | ---                  | ---   | ---        | ---       | ---         | ---       | ---   | ---             | ---        | ---           | ---       |
| ---      | ---                  | ---   | ---        | ---       | ---         | ---       | ---   | ---             | ---        | ---           | ---       |
| Avera    | ---                  | 4.1   | 0.54       | 2.1       | 2.1         | 0.0       | 0.6   | 335.8           | 1.7        | 1.3           | ---       |
| SD(N)    | ---                  | 0.0   | 0.03       | 0.2       | 0.2         | 0.0       | 0.0   | 17.3            | 0.0        | 0.2           | ---       |
| CV%      | ---                  | 0.0   | 4.83       | 7.8       | 7.8         | 0.0       | 8.3   | 5.1             | 0.0        | 12.7          | ---       |

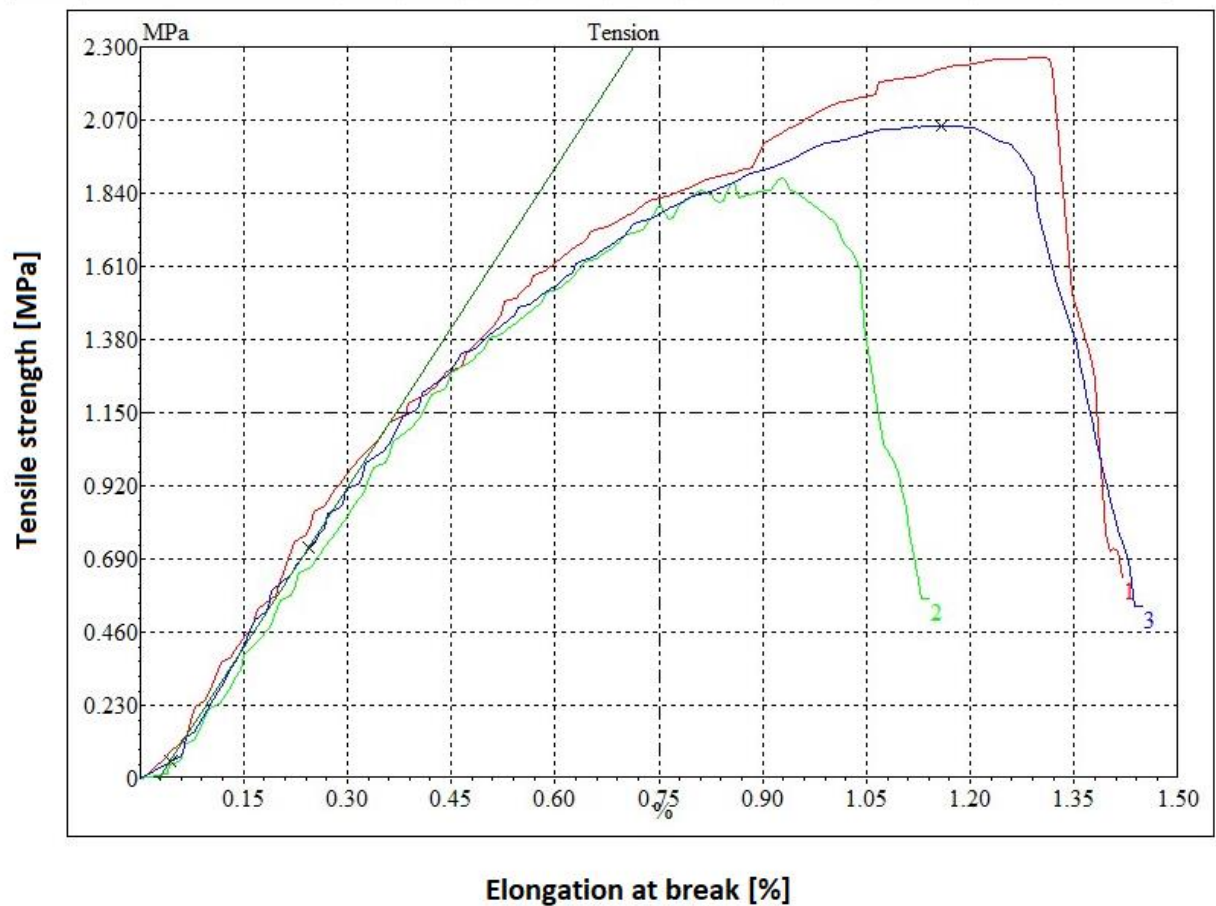

**EVA 15006+ W.F (70%)**

Speed: 100.000 mm/min

Extrusion Grinev (Thickness: 1.0 mm) ; +21.8°C, 7.7%HR Test Data: 14-12-2017

Metod

| Test No. | Material             | Width<br>mm | Thick<br>ness<br>mm | Max.<br>Load<br>MPa | Yeild<br>point<br>MPa | Max.<br>Load<br>% | Break<br>MPa | Elastic<br>modulus<br>MPa | Input<br>Grip<br>% | Grip<br>traversa<br>% | Comentary<br>o |
|----------|----------------------|-------------|---------------------|---------------------|-----------------------|-------------------|--------------|---------------------------|--------------------|-----------------------|----------------|
| 1        | EVA 15006+ W.F (70%) | 4.1         | 0.59                | 2.7                 | 2.7                   | -                 | 0.7          | 177.0                     | 1.7                | 1.6                   | OK             |
| 2        | EVA 15006+ W.F (70%) | 4.1         | 0.59                | 2.8                 | 2.8                   | -                 | 0.8          | 199.3                     | 1.7                | 1.5                   | NO             |
| 3        | EVA 15006+ W.F (70%) | 4.1         | 0.58                | 3.0                 | 3.0                   | 1.7               | 0.9          | 204.4                     | 1.7                | 1.9                   | OK             |
| ---      | ---                  | ---         | ---                 | ---                 | ---                   | ---               | ---          | ---                       | ---                | ---                   | ---            |
| ---      | ---                  | ---         | ---                 | ---                 | ---                   | ---               | ---          | ---                       | ---                | ---                   | ---            |
| ---      | ---                  | ---         | ---                 | ---                 | ---                   | ---               | ---          | ---                       | ---                | ---                   | ---            |
| Avera    | ---                  | 4.1         | 0.59                | 2.8                 | 2.8                   | 1.7               | 0.8          | 193.6                     | 1.7                | 1.7                   | ---            |
| SD(N)    | ---                  | 0.0         | 0.00                | 0.1                 | 0.1                   | 0.0               | 0.1          | 11.9                      | 0.0                | 0.2                   | ---            |
| CV%      | ---                  | 0.0         | 0.80                | 4.4                 | 4.4                   | 0.0               | 10.2         | 6.1                       | 0.0                | 10.2                  | ---            |

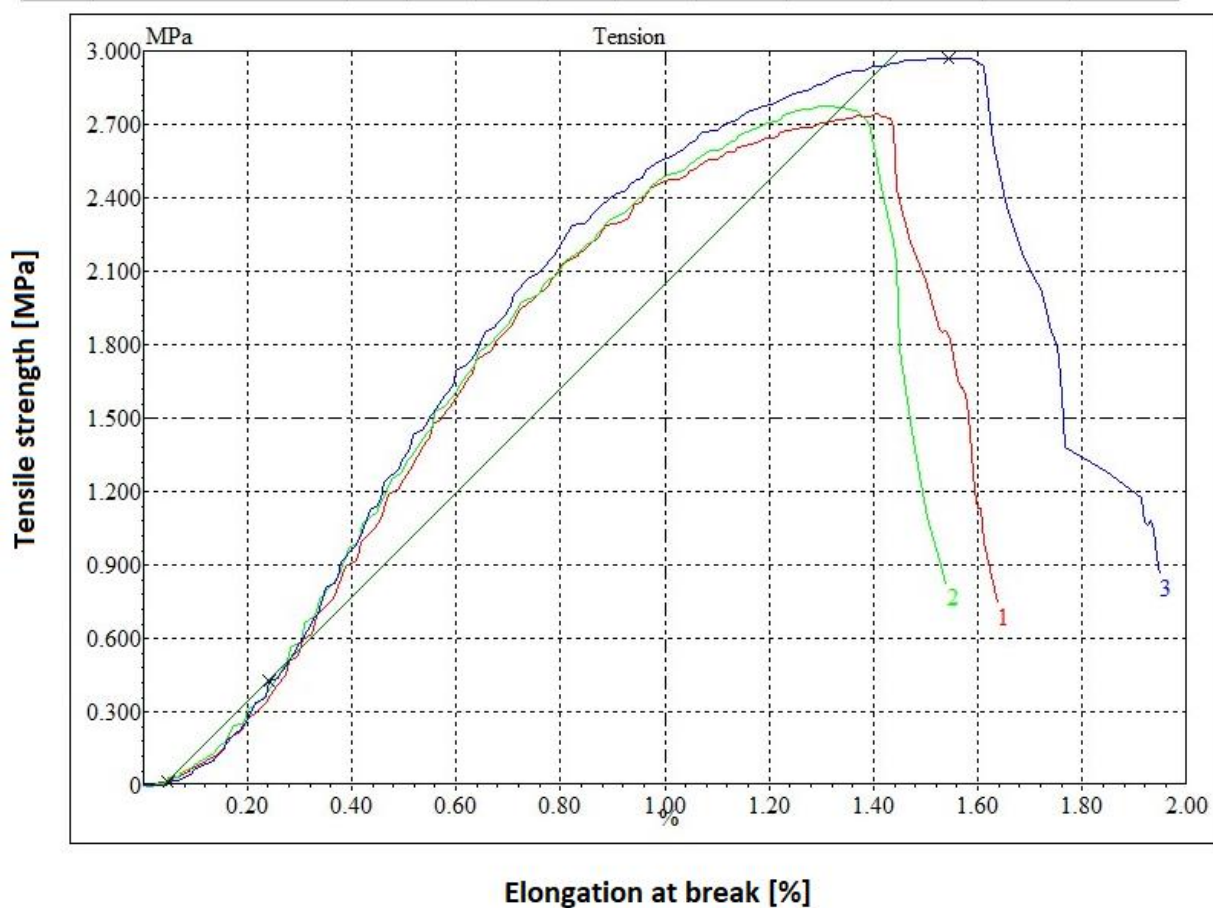

Supplement: s1 [file s1]
